1  
2  
3  
4  
5  
6  
7  
8  
9  
10  
11  
12  
13  
14  
15  
16  
17

## **Circadian Proteins Cry and Rev-erb Converge to Deepen Cellular Quiescence by Downregulating Cyclin D and Cdk4,6**

Xia Wang<sup>1#</sup>, Bi Liu<sup>1,2#</sup>, Qiong Pan<sup>1</sup>, Jungeun Sarah Kwon<sup>1</sup>, Matthew A. Miller<sup>1</sup>,  
Kimiko Della Croce<sup>1</sup>, Guang Yao<sup>1,3\*</sup>

<sup>1</sup>Department of Molecular and Cellular Biology, University of Arizona, Tucson, AZ, 85721, USA

<sup>2</sup>School of Life Sciences, Westlake University, Hangzhou, 310024, China

<sup>3</sup>Arizona Cancer Center, University of Arizona, Tucson, AZ, 85719, USA

<sup>#</sup>These authors contributed equally to this work.

<sup>\*</sup>Correspondence should be addressed to: [guangyao@arizona.edu](mailto:guangyao@arizona.edu)

18      **ABSTRACT**

19      The proper balance and transition between cellular quiescence and proliferation are  
20      critical to tissue homeostasis, and their deregulations are commonly found in many  
21      human diseases, including cancer and aging. Recent studies showed that the reentry of  
22      quiescent cells to the cell cycle is subjected to circadian regulation. However, the  
23      underlying mechanisms are largely unknown. Here, we report that two circadian  
24      proteins, Cryptochrome (Cry) and Rev-erb, deepen cellular quiescence in rat embryonic  
25      fibroblasts, resulting in stronger serum stimulation required for cells to exit quiescence  
26      and reenter the cell cycle. This finding was opposite from what we expected from the  
27      literature. By modeling a library of possible regulatory topologies linking Cry and Rev-  
28      erb to a bistable Rb-E2f gene network switch that controls the quiescence-to-  
29      proliferation transition and by experimentally testing model predictions, we found Cry  
30      and Rev-erb converge to downregulate Cyclin D/Cdk4,6 activity, leading to an  
31      ultrasensitive increase of the serum threshold to activate the Rb-E2f bistable switch.  
32      Our findings suggest a mechanistic role of circadian proteins in modulating the depth  
33      of cellular quiescence, which may have implications in the varying potentials of tissue  
34      repair and regeneration at different times of the day.

35

36      **Keywords:** Circadian; Quiescence; Dormancy; Proliferation; Quiescence depth;

37      Cell cycle entry; Rb-E2f switch; Exploratory model search

38

39

## 40 INTRODUCTION

41 Upon growth signals, various types of quiescent cells (e.g., adult stem and progenitor  
42 cells) can reenter the cell cycle to proliferate. This quiescence-to-proliferation transition  
43 is fundamental to tissue homeostasis and repair<sup>1-3</sup>. This transition, as shown in recent  
44 studies, also appears to be affected by the circadian clock. For example, quiescent  
45 neural stem cells and progenitor cells initiate neurogenesis to produce new neurons in  
46 a circadian-dependent manner<sup>4,5</sup>; similarly does the circadian activation of hair follicle  
47 stem cells for tissue renewal<sup>6</sup>.

48 Circadian clocks are present in cells throughout mammalian tissues. These  
49 clocks are cell-autonomous yet orchestrated by a master pacemaker in the  
50 hypothalamus<sup>7-10</sup>. Cellular circadian clocks are primarily driven by coupled negative  
51 feedback loops formed between a Bmal1/Clock heterodimer and its transcriptional  
52 targets: cryptochrome (Cry), period (Per), and Rev-erb, which in turn inhibit  
53 Bmal1/Clock<sup>11</sup>. In proliferating cells, several circadian proteins crosstalk to cell cycle  
54 proteins<sup>12-15</sup>. For example, Bmal1 represses the expression of Myc<sup>16,17</sup>, a transcription  
55 factor that promotes cell proliferation; Rev-erb represses the expression of p21<sup>Cip1</sup> (p21  
56 for short)<sup>18</sup>, a cyclin-dependent kinase (Cdk) inhibitor of G1 and S Cdks (Cdk4,6 and  
57 Cdk2); Bmal1/Clock activates Wee1<sup>19</sup>, leading to the suppression of Cyclin B1/Cdk1  
58 activity that is critical to mitosis, while Cry does the opposite by inhibiting Wee1<sup>19</sup>.  
59 These molecular interactions lead to the circadian regulation of the proliferative cell  
60 cycle<sup>17-20</sup>. However, how the circadian clock regulates the transition to proliferation  
61 from quiescence remains largely unknown.

62 Cellular quiescence is not a homogeneous state but heterogeneous<sup>1, 21, 22</sup>. The  
63 likelihood of quiescence-to-proliferation transition is reversely correlated with  
64 quiescence depth. Upon growth stimulation, cells at deeper quiescence are less likely  
65 to, and take longer time if they do, reenter the cell cycle and initiate DNA replication  
66 than cells at shallower quiescence<sup>21, 23, 24</sup>. Deeper quiescence is often observed in aging  
67 cells in the body<sup>25, 26</sup> or in cells remaining quiescent for longer durations in culture<sup>21,</sup>  
68 <sup>27</sup>. Shallower quiescence is seen in stem cells responding to tissue injury<sup>28, 29</sup> or related  
69 systemic signals<sup>30, 31</sup>.

70 We have shown recently that quiescence depth is regulated by an Rb-E2f  
71 bistable switch and its interacting pathways<sup>21, 32, 33</sup>. E2f transcription activators (E2f1-

72 3a, referred to as E2f for short), by transactivating genes necessary for DNA synthesis  
73 and cell cycle progression, are both necessary and sufficient for cell cycle entry from  
74 quiescence<sup>34,35</sup>. E2f is repressed by Rb family proteins (referred to as Rb for short) in  
75 quiescent cells and activated upon stimulation with serum growth factors. E2f  
76 activation upon serum stimulation is mediated by multiple positive feedbacks leading  
77 to the phosphorylation and inhibition of Rb by Cyclin D (CycD)/Cdk4,6 and Cyclin E  
78 (CycE)/Cdk2 complexes. These integrated positive feedbacks establish the bistability  
79 at the Rb-E2f gene network level, converting graded and transient growth signals into  
80 an all-or-none E2f activation<sup>32,36</sup>, which further triggers and couples with APC/C<sup>CDH1</sup>  
81 inactivation via EMI1 and CycE/Cdk2, leading to an irreversible entry of the S-phase  
82 of the cell cycle and thus the quiescence-to-proliferation transition<sup>37,38</sup>. The serum  
83 threshold (i.e., minimum serum concentration) that activates the Rb-E2f bistable switch,  
84 the E2f-activation threshold for short, has been shown to determine quiescence depth  
85 <sup>21</sup>.

86 In this study, we examined the effects of two circadian proteins, Cry and Rev-  
87 erb, on the cellular transition from quiescence to proliferation. We anticipated that Cry  
88 and Rev-erb activities, via their known roles in upregulating Myc and downregulating  
89 p21, respectively, might lead to shallower quiescence by reducing the E2f-activation  
90 threshold<sup>21</sup>. However, we observed the opposite in our experiments. Through a  
91 comprehensive modeling search and follow-up experiments, we found both Cry and  
92 Rev-erb play novel roles that converge to downregulate CycD/Cdk4,6 activity, leading  
93 to an ultrasensitive increase of the E2f-activation threshold and quiescence depth.

94

## 95 **RESULTS**

### 96 **Circadian protein Cry deepens cellular quiescence**

97 Earlier studies have suggested that Bmal1 inhibits Myc expression, and consistently,  
98 Cry upregulates Myc<sup>16,17</sup>. As Myc promotes E2f activation<sup>39</sup>, we tested the potential  
99 effect of Cry on the quiescence-to-proliferation transition. We started by applying a  
100 recently developed specific Cry agonist KL001<sup>40</sup> to rat embryonic fibroblasts  
101 (REF/E23 cells). When treated with KL001 ( $\leq 40 \mu\text{M}$ , below its cytotoxicity level, Fig  
102 S1A), REF/E23 cells induced to quiescence by serum starvation did exhibit a modest  
103 but statistically significant increase of Myc protein (Fig. S2A); this increase, however,

104 became insignificant when quiescent REF/E23 cells were stimulated to enter the cell  
105 cycle (10 and 14 hours after serum stimulation, Fig. S2B). Assuming the modest  
106 increase of Myc in quiescent cells might facilitate their E2f activation and transition  
107 into proliferation, we expected quiescence depth might be slightly reduced, if any, under  
108 KL001 treatment. To our surprise, we found KL001 treatment deepened quiescence:  
109 with increasing KL001 doses, increasing serum concentrations were needed to drive  
110 similar percentages of cells to reenter the cell cycle (arrow pointed, ~45%; Fig. 1A,  
111 based on EdU incorporation, EdU+; Fig. S2C, based on the “On”-state of an E2f-GFP  
112 reporter, E2f-ON<sup>32</sup>). Consistently, when stimulated at a given serum concentration (e.g.,  
113 8% serum, Fig. 1A and S2C), the percentage of cells that reentered the cell cycle  
114 decreased with increasing KL001 doses.

115 Similarly, quiescence deepened with the treatment of a different Cry agonist or  
116 with ectopic Cry1 expression. First, when REF/E23 cells were treated with the 2<sup>nd</sup> Cry  
117 agonist, KL002, increasing serum concentrations were needed to drive similar  
118 percentages of cells to reenter the cell cycle (Fig. S2D, based on EdU+%; Fig. S2E,  
119 based on E2f-ON%). Consistently, when stimulated at a given serum concentration, the  
120 percentage of cells that reentered the cell cycle decreased with increasing KL002 doses  
121 (Fig. S2 D and E). Second, in quiescent REF/E23 cells transfected with a Cry1 vector  
122 and expressing ectopic Cry1 (albeit at a much lower level in quiescence than in growing  
123 condition, Fig. 1B), the percentage of cells that reentered the cell cycle (EdU+%) in  
124 response to serum stimulation decreased ( $p < 0.01$ ) compared to that in the mCherry-  
125 transfection control (driven by the same CMV promoter, Fig. 1C). Our results from two  
126 Cry agonists and ectopic Cry expression, put together, suggested that Cry drove cells  
127 to deeper quiescence, instead of facilitating the quiescence-to-proliferation transition.

128

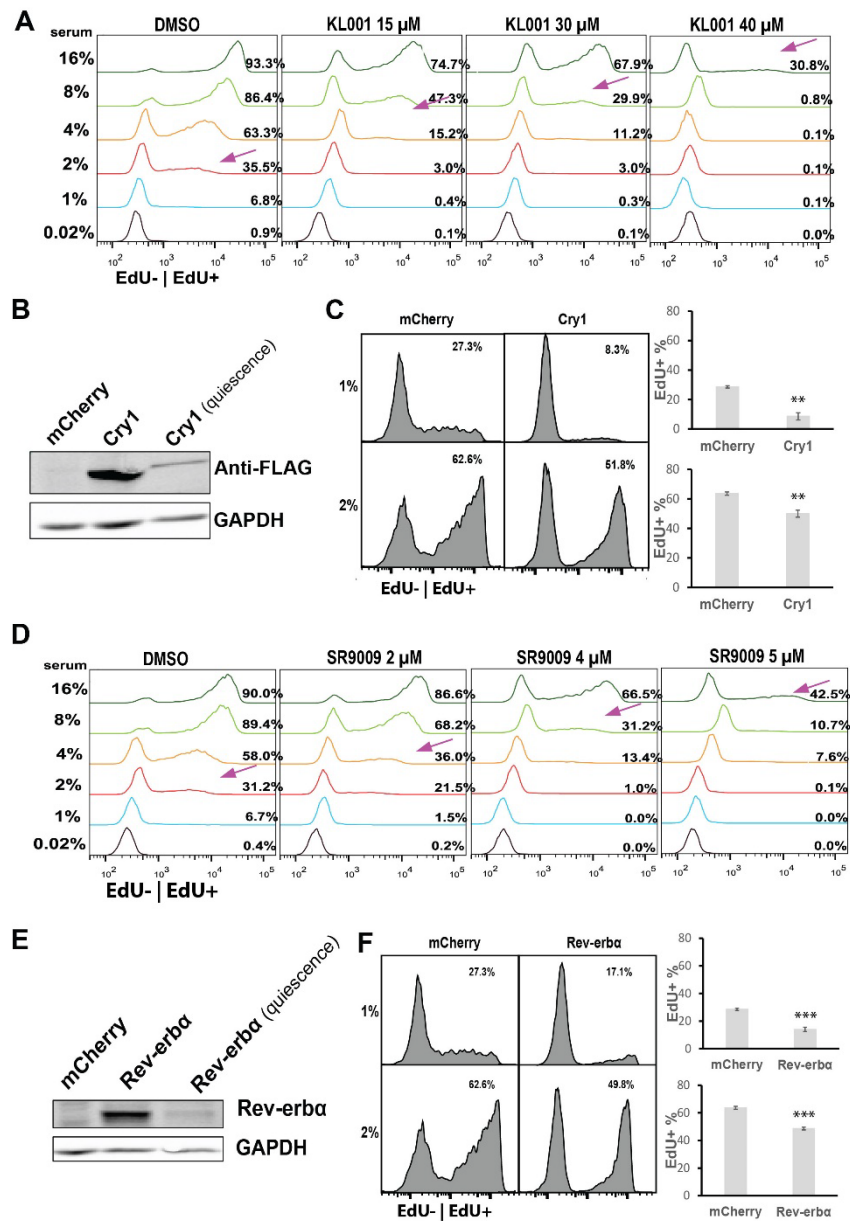

129

130 **Figure 1. Cry and Rev-erb drive cells to deeper quiescence.**

131 (A) Effect of Cry agonist KL001 on quiescence depth. REF/E23 cells were first induced to  
 132 quiescence by serum starvation for 2 days, then treated with the agonist at the indicated  
 133 concentrations in starvation medium for 1 day; cells were subsequently stimulated by switching to  
 134 growth medium containing serum and agonist at the indicated concentrations for the indicated  
 135 durations. This protocol, serum stimulation (STI) of 3-day quiescent cells under agonist treatment  
 136 (STI.3dq/agonist for short), was used for all agonist-related tests in this study unless otherwise noted.  
 137 Indicated to the right of individual histograms are the percentages of cells becoming EdU+ after 24  
 138 hours of serum stimulation. Arrows indicate the approximate serum concentrations resulting in  
 139 EdU+ % = 45%.

140 (B) Ectopic Cry1 expression. Proliferating cells were transfected with a FLAG-tagged Cry1 vector or a mCherry control and then subjected to Western blot with a FLAG antibody. “Quiescence”  
 141 indicates the Western blot performed in Cry1-transfected cells induced to quiescence by 2-day  
 142 serum-starvation.  
 143

144 (C) Effect of ectopic Cry1 on quiescence depth. Cry1- or mCherry-transfected cells were induced  
 145 to quiescence by 2-day serum-starvation, stimulated with serum at the indicated concentrations for  
 146 30 hours, and assayed for EdU+%. Error bar, SEM (n = 3). \*\*p < 0.01, \*\*\*p < 0.001 (1-tailed t-test;  
 147 the same below).

148 (D) Effect of Rev-erb agonist SR9009 on quiescence depth. Quiescent cells were serum stimulated  
149 following the STI.3dq/agonist protocol. Serum and SR9009 concentrations are as indicated. EdU+%  
150 at the 24-hour after serum stimulation are shown to the right of individual histograms. Arrows  
151 indicate the approximate serum concentrations leading to EdU+% = 45%.

152 (E) Ectopic Rev-erb $\alpha$  expression. Proliferating cells were transfected with a Rev-erb $\alpha$  vector or a  
153 mCherry control and then subjected to Western blot with a Rev-erb antibody. “Quiescence” indicates  
154 the Western blot performed in Rev-erb-transfected cells induced to quiescence by 2-day serum-  
155 starvation.

156 (F) Effect of ectopic Rev-erb on quiescence depth. Rev-erb- or mCherry-transfected cells were  
157 induced to quiescence by 2-day serum-starvation, stimulated with serum at the indicated  
158 concentrations for 30 hours, and assayed for EdU+%. Error bar, SEM (n = 3). \*\*p < 0.01.

159

## 160 **Circadian protein Rev-erb deepens cellular quiescence**

161 Next, we examined another link between circadian proteins and the Rb-E2f switch:  
162 Rev-erb inhibits the expression of Cdk inhibitor (CKI) p21<sup>18</sup>, while p21 was known to  
163 deepen quiescence by increasing the E2f-activation threshold<sup>21</sup>. Therefore, we  
164 expected Rev-erb to reduce the E2f-activation threshold and thus quiescence depth.  
165 When we treated REF/E23 cells with a Rev-erb agonist SR9009 ( $\leq 5 \mu\text{M}$ , below its  
166 cytotoxicity level, Fig S1B), we did observe a significant decrease of p21 protein level  
167 at intermediate and high SR9009 doses (4 and 5  $\mu\text{M}$ ) both in quiescence (Fig. S3A) and  
168 during cell cycle entry (10 and 14 hours after serum stimulation, Fig. S3B). However,  
169 SR9009-treated cells did not move to shallower quiescence but deeper: with increasing  
170 SR9009 doses, increasing serum concentrations were needed to drive similar  
171 percentages of cells to reenter the cell cycle (arrow pointed,  $\sim 45\%$ ; Fig. 1D, based on  
172 EdU+%; Fig. S3C, based on E2f-ON%). When stimulated with serum at a given  
173 concentration, the percentage of cells that reentered the cell cycle decreased with  
174 increasing SR9009 doses (Fig. 1D and Fig. S3C). Similarly, treating cells with the 2<sup>nd</sup>  
175 Rev-erb agonist, SR9011, also deepened quiescence (Fig. S3D and E). Consistent with  
176 the effects of Rev-erb agonists, ectopic Rev-erb expression deepened quiescence: in  
177 quiescent REF/E23 cells transfected with a Rev-erb vector and expressing ectopic Rev-  
178 erb (albeit at a much lower level in quiescence than in growing condition, Fig. 1E), the  
179 percentage of cells that reentered the cell cycle (EdU+%) in response to serum  
180 stimulation decreased (p < 0.01) compared to that in the mCherry-transfection control  
181 (driven by the same CMV promoter, Fig. 1F). Combining our results based on two  
182 agonists and ectopic expression, it suggested that Rev-erb drove cells to deeper  
183 quiescence instead of facilitating the quiescence-to-proliferation transition.

184

185 **Both Cry and Rev-erb downregulate CycD/Cdk4,6 to deepen quiescence as**

---

186 **predicted by exploratory model search**

187 Circadian proteins Cry and Rev-erb both deepened quiescence unexpectedly, indicating  
188 certain mechanistic links were missing in our understanding between these circadian  
189 proteins and cellular quiescence. As our earlier studies showed that the E2f-activation  
190 threshold determines quiescence depth<sup>21,36</sup>, this threshold mechanism provides a likely  
191 target for circadian regulation. We therefore searched for the potential missing links  
192 connecting Cry and Rev-erb to the E2f-activation threshold.

193 The Rb-E2f gene network is a complex system comprised of over 90 gene nodes  
194 involved in intertwined transcriptional controls and signaling cascades<sup>41-45</sup>. It would  
195 be time- and labor-intensive to test the candidate links one by one in experiments  
196 without first effectively narrowing down the candidates. To this end, we took advantage  
197 of our previously established mathematical model of the Rb-E2f bistable switch<sup>32</sup> and  
198 used computer simulation to predict the most likely missing link(s) responsible for the  
199 quiescence-deepening effects of Cry and Rev-erb. Our previous Rb-E2f bistable switch  
200 model considered five coarse-grained network modules: Myc, CycD/Cdk4,6, Rb, E2f,  
201 and CycE/Cdk2 (Fig. 2A). Upon serum growth signals, Myc and CycD/Cdk4,6 are  
202 upregulated. Myc promotes E2f expression; CycD/Cdk4,6 phosphorylates Rb and  
203 partially de-represses E2f. E2f activates CycE/Cdk2, which further phosphorylates Rb  
204 and de-repress E2f, forming a positive feedback loop. E2f transactivates its own  
205 expression, forming another positive feedback loop that reinforces E2f activation. Next,  
206 we considered Cry or Rev-erb (the C/R module, Fig. 2A) might directly or indirectly  
207 interact with any or all of the five modules (i.e., five possible links), and exert one of  
208 three net effects (up-regulation, down-regulation, or no effect). For example, the two  
209 literature links we started the study with, Cry upregulating Myc and Rev-erb inhibiting  
210 p21, were reflected in C/R upregulating Myc and Cyclin/Cdk modules (CycD/Cdk4,6  
211 and CycE/Cdk2, via downregulating p21), respectively. Considering the possible  
212 combinations of 5 links with 3 effects each,  $3^5 = 243$  different topologies could be  
213 generated to connect C/R to the Rb-E2f switch.



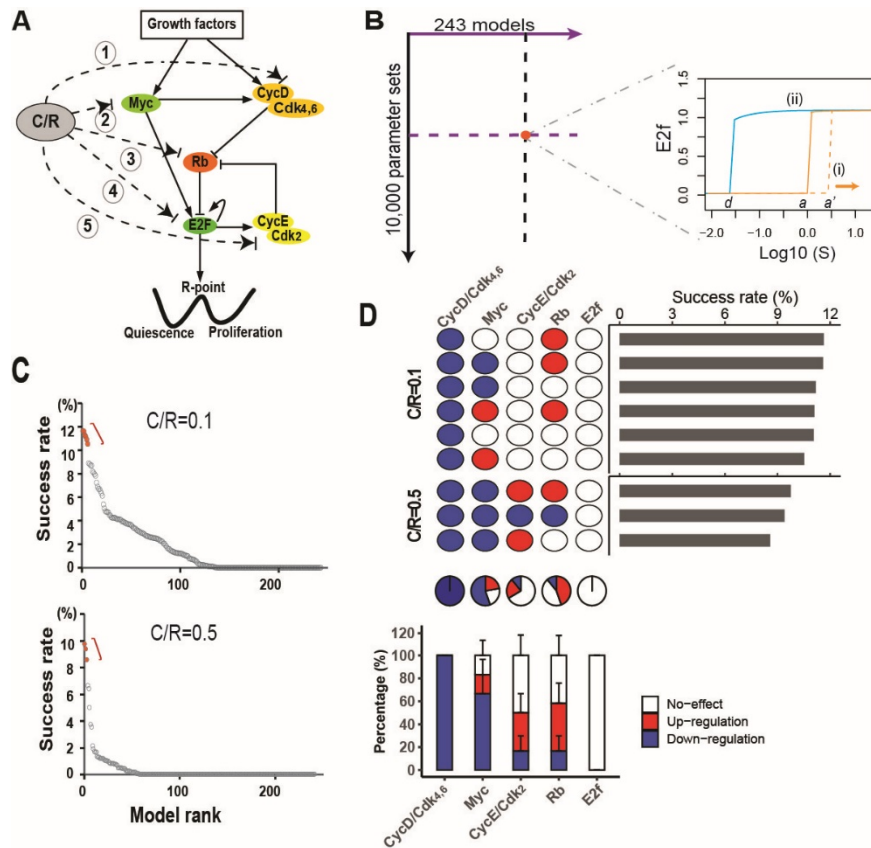

214

215 **Figure 2. Modeling search for the missing links of how Cry and Rev-erb deepen quiescence.**

216 (A) Cry or Rev-erb (C/R) may crosstalk with any or all of the five Rb-E2f network modules, and  
 217 each of the five links (1-5) can have one of the three possible net effects: upregulation,  
 218 downregulation, and no-effect, thus generating  $3^5 = 243$  possible network topologies.

219 (B) Model search and simulation. Each of the 243 models was simulated with 10,000 random  
 220 parameter sets; with each parameter set, the model was evaluated according to two criteria: (i) E2f-  
 221 activation threshold  $a' \geq 3$  (serum units); and (ii) bistability (as in the base model, E2f-activation  
 222 threshold  $a > \text{E2f-deactivation threshold } d$ ). S (x-axis), serum unit; E2f (y-axis), steady-state E2f  
 223 level. Solid orange and blue curves indicate E2f serum-responses in the base model simulated from  
 224 the quiescence and proliferation initial conditions, respectively. For simplicity, only the E2f serum-  
 225 response from quiescence simulated with one random parameter set (dashed orange curve) is shown.  
 226 See Materials and methods for details.

227 (C) Model ranking. The 243 models were ranked from left to right (x-axis) based on model  
 228 success rate (y-axis), which indicated the percentage of events (random parameter sets) in which the  
 229 model simulation outcome fulfilled the two criteria (i) and (ii). Simulation results with the C/R input  
 230 level of 0.1 and 0.5 are shown at the top and bottom, respectively.

231 (D) Link features of top-ranked models. (Top) Highest-ranked models with similar success rates at  
 232 C/R = 0.1 and 0.5, respectively (red dots in C). The link features in each model are shown according  
 233 to the upregulation (red), downregulation (blue), or no-effect (white) of the indicated target node by  
 234 C/R. (Middle) Pie chart of the percentage of each link feature at the indicated target node among  
 235 the combined 9 models (top). (Bottom) The average percentage of each link feature at the indicated  
 236 target node between the two model groups (C/R = 0.1 and 0.5, respectively, top). Error bar, SD.  
 237

238 We constructed a library of 243 ordinary differential equation (ODE) models to  
 239 represent the 243 network topologies. Based on our experimental observations, we set  
 240 two search criteria for the most likely missing link(s) between C/R and the Rb-E2f  
 241 switch: (i) increasing the E2f-activation threshold, and (ii) maintaining the network

242 bistability. Specifically, for criterion i, we set the E2f-activation threshold to increase  
243 from 1.0 in the previous base model<sup>32</sup> to  $\geq 3.0$ , since comparable EdU+% was obtained  
244 with 1% serum in the DMSO control and ~3% serum under KL001 and SR9009  
245 treatments at intermediate doses (KL001, 30  $\mu$ M; SR9009, 4  $\mu$ M; Fig. 1A and D).  
246 Criterion ii was set because we expected the Rb-E2f bistable switch to remain critical  
247 to the proper quiescence-to-proliferation transition under circadian regulation; it was  
248 also consistent with the bimodal E2f expression observed under KL001 and SR9009  
249 treatments (similar to the DMSO control, Fig. S2C and S3C).

250 We subsequently simulated each of the 243 ODE models with a collection of  
251 random parameter sets. Each set contained 5 model parameters that dictated the  
252 strengths of the 5 links from C/R to Rb-E2f network modules ( $I_{1-5}$ , Tables S1 and S2),  
253 with parameter values simultaneously and randomly selected within the numerical  
254 ranges as determined in our previous modeling studies<sup>32, 46</sup>. We then calculated the  
255 success rate of each of the 243 models in fulfilling the search criteria (i) and (ii) across  
256 the random parameter sets (Fig. 2B, see Materials and Methods for detail). In this regard,  
257 we also applied two different C/R input levels to account for relatively low and high  
258 agonist doses, respectively (Fig. 2C). The models with the highest success rates (i.e.,  
259 most robust against parameter variations<sup>46-48</sup>) were considered the most likely  
260 explanations for how Cry and Rev-erb increased the E2f-activation threshold and  
261 deepened quiescence as we observed in experiments (Fig. 1A and D).

262 We found the compositions of the top 10 models remained the same after 5,000  
263 random parameter sets at C/R = 0.1 (Table S3) and 3,750 parameter sets at C/R = 0.5  
264 (Table S4), respectively, suggesting the model search results were stabilized. As seen  
265 in Fig. 2C, the final model success rates (after 10,000 parameter sets) declined rapidly  
266 moving away from the top-ranked models at each C/R input level, suggesting that a  
267 limited number of model topologies were viable for the C/R activity to deepen  
268 quiescence. That said, no single model “winner” stood out. For example, the top 6  
269 models at C/R = 0.1 (red dots, Fig. 2C top panel) formed a cluster; within the cluster,  
270 any two neighboring models A and B exhibited similar success rates (s.r.), with the  
271 relative s.r. difference  $(s.r._A - s.r._B) / s.r._A < 10\%$ . The same was true for the top 3 models  
272 at C/R = 0.5 (red dots, Fig 2C bottom). Comparing these top s.r. models (6 at C/R = 0.1;  
273 3 at C/R = 0.5), one uniquely shared feature became apparent: the downregulation of  
274 CycD/Cdk4,6 by C/R in every model (Fig. 2D). Alternatively, when we chose the 10

275 top-ranked models at each C/R input level (10 at C/R = 0.1; 10 at C/R = 0.5) as another  
276 high-s.r. model selection approach, CycD/Cdk4,6 downregulation by C/R was again the  
277 number one shared feature (Fig. S4). These model simulation results predicted that Cry  
278 and Rev-erb likely induced deep quiescence by primarily targeting and downregulating  
279 CycD/Cdk4,6 activity. We will further interpret these modeling results in Discussion.

### 280 **Experimental support for CycD/Cdk4,6 as the primary target of Cry and Rev-erb**

281 To test our model predictions, we measured the responses of CycD/Cdk4,6 complex  
282 components to Cry and Rev-erb and compared them to those of CycE/Cdk2 complex  
283 components. Specifically, following the same STI.3dq/agonist protocol (Fig. 1), we  
284 treated REF/E23 cells with Cry and Rev-erb agonists and measured the protein levels  
285 of D-type cyclins CycD1 and CycD3 (CycD2 is not expressed in REF/E23 cells<sup>23</sup>),  
286 Cdk4, and Cdk6, as well E-type cyclins (CycE1 and CycE2) and Cdk2 in quiescence  
287 and during cell cycle entry upon serum stimulation (Fig. 3).

288 We observed a significant downregulation of each tested CycD/Cdk4,6 complex  
289 component in response to both the Cry agonist KL001 (Fig. 3A) and Rev-erb agonist  
290 SR9009 (Fig. 3B). This general pattern occurred across the three tested time points (0,  
291 10, and 14 hours upon serum stimulation), especially at the medium and high agonist  
292 doses (KL001, 30 and 40  $\mu$ M; SR9009, 4 and 5  $\mu$ M; see Discussion for the low dose).  
293 This pattern of CycD/Cdk4,6 downregulation in response to Cry and Rev-erb agonists  
294 was in stark contrast to that of CycE/Cdk2 complex components, which exhibited non-  
295 significant changes overall (Fig. 3). These experimental observations were in good  
296 agreement with our model simulation results (Fig. 2D and S4), showing a convergent  
297 downregulation of CycD/Cdk4,6 by Cry and Rev-erb.

298 Similarly, we measured the responses of other proteins (Rb; Rb phosphatases  
299 PP1 and PP2A; Myc; CKIs p21, p27, and p16) in the Rb-E2f bistable switch network  
300 to Cry and Rev-erb agonists (Fig. S5). None of the observed responses, if any, would  
301 explain quiescence deepening (see Discussion). Put together, our experimental results  
302 supported the model-predicted unique role of CycD/Cdk4,6 as the convergent target of  
303 the circadian regulation by Cry and Rev-erb on quiescence depth.

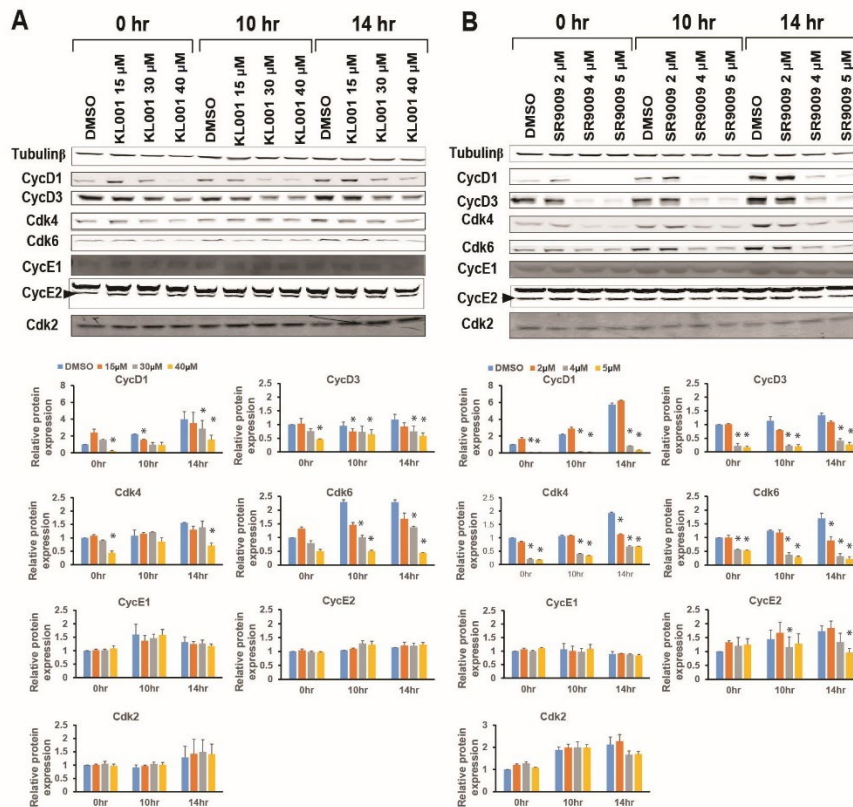

304

305 **Figure 3. Cry and Rev-erb downregulate protein components of CycD/Cdk4,6 but not**  
 306 **CycE/Cdk2.**

307 The responses of individual protein components of CycD/Cdk4,6 and CycE/Cdk2 to the Cry agonist  
 308 KL001 (A) and Rev-erb agonist SR9009 (B) at the indicated doses were measured following the  
 309 STI.3dq/agonist protocol. Protein levels were measured by Western blot in quiescence (0 hr) and  
 310 during cell cycle entry (10 and 14 hr after stimulated with 4% serum) and normalized to the 0-hr  
 311 DMSO control. Error bar, SEM (n=2); \*p < 0.05 (1-tailed t-test).

312

313 **DISCUSSION**

314 The circadian clock aligns diverse cellular functions to periodic daily environmental  
 315 changes. In this study, we investigated the effects of two key circadian proteins, Cry  
 316 and Rev-erb, on cellular quiescence. We found upregulating Cry and Rev-erb drove  
 317 cells into deeper quiescence, opposite to what we had hypothesized based on literature.  
 318 To identify the missing links in our understanding, we evaluated an assembly of  
 319 potential network models and tested the converged predictions of the top-ranked models  
 320 experimentally. Our results suggested that both Cry and Rev-erb deepen quiescence by  
 321 primarily downregulating the CycD/Cdk4,6 complex components in the bistable Rb-  
 322 E2f gene network.

323 Why does the CycD/Cdk4,6 module play a unique role, targeted by both Cry  
 324 and Rev-erb, in mediating quiescence deepening? To move into deep quiescence, a cell

325 needs to increase its E2f-activation threshold while maintaining the Rb-E2f bistable  
326 switch for the proper quiescence-proliferation transition. In this regard, altering the  
327 activities of different Rb-E2f network modules has different consequences, depending  
328 on their positions and roles in the network (Fig. 2A). For example, changing Cyclin/Cdk  
329 activity has a stronger effect than changing Rb synthesis in increasing the E2f-  
330 activation threshold (determined by the ratio of unphosphorylated Rb over free E2f)<sup>21</sup>.  
331 Between the two G1 Cyclin/Cdks, late G1 CycE/Cdk2 hyper-phosphorylates Rb, and  
332 CycE/Cdk2 downregulation is associated with cell cycle arrest or exit into quiescence  
333 in proliferating cells<sup>49, 50</sup>. To drive quiescent cells deeper by targeting CycE/Cdk2,  
334 however, can be problematic. This is because downregulating CycE/Cdk2 weakens the  
335 mutual-inhibition (i.e., positive feedback) loop between Rb and E2f that is essential to  
336 the network bistability<sup>46</sup> and consequentially the proper quiescence-to-proliferation  
337 transition. Similarly, targeting and inhibiting E2f to increase the E2f-activation  
338 threshold could be problematic, as repressing E2f weakens both positive feedbacks (Rb-  
339 E2f mutual-inhibition and E2f auto-activation) in the Rb-E2f network underlying the  
340 network bistability. By contrast, CycD/Cdk4,6 is upstream of and not directly involved  
341 in the positive feedback loops between Rb and E2F (Fig. 2A). We therefore expect that  
342 targeting to inhibit CycD/Cdk4,6 can better divide and conquer the needs to both  
343 increase the E2f-activation threshold and maintain the Rb-E2f bistable switch.  
344 Consistently, Cdk6 expression level was found to regulate the quiescence depth of  
345 human hematopoietic stem cells and impact their long-term preservation<sup>51</sup>.

346 Relatedly, in proliferating cells, CycD level appears to reflect the protein  
347 synthesis rate of the mother cell, and the CycD level inherited from the mother cell is a  
348 key determinant of the proliferation-quiescence bifurcation of daughter cells<sup>52, 53</sup>. On  
349 another note, a recent study suggested that CycD/Cdk4,6 mono-phosphorylates but  
350 does not inhibit Rb, and it meanwhile activates CycE/Cdk2 via an unidentified  
351 mechanism<sup>54</sup>. Although this new finding and the classic model differ in whether  
352 CycD/Cdk4,6 directly inhibits Rb, they are consistent in the role of CycD/Cdk4,6 in  
353 leading to CycE/Cdk2 activation and initiating the positive mutual-inhibition loop  
354 between Rb and E2f, which eventually leads to E2f activation and the passage of the  
355 restriction point during the quiescence-to-proliferation transition<sup>55-60</sup>.

356 A closer look of CycD/Cdk4,6 responses to Cry and Rev-erb agonists showed  
357 that the protein levels of CycD1, CycD3, Cdk4, and Cdk6 decreased noticeably at the

358 medium and high doses of KL001 and SR9009, but not at their low doses (15  $\mu$ M  
 359 KL001, Fig. 3A; 2  $\mu$ M SR9009, Fig. 3B). How would this result at low dose conditions  
 360 explain the then still significantly deepened quiescence (Fig. 1A and D)? It turns out  
 361 Rb phosphorylation can be ultrasensitive to CycD/Cdk4,6 activity. That is, a small  
 362 downregulation of CycD/Cdk4,6 may cause a much larger decrease of Rb  
 363 phosphorylation during cell cycle entry (see the 10- and 14-hr sim curves, Fig. 4A), as  
 364 predicted by our Rb-E2f bistable switch model reflecting the phosphorylation-  
 365 dephosphorylation zero-order ultrasensitivity<sup>61</sup>. As a rough estimate, CycD/Cdk4,6  
 366 activity under the low doses of KL001 and SR9009 was reduced by about 30% during  
 367 cell cycle entry (considering joint cyclin, Cdk, and CKI levels, Table S5), which could  
 368 result in an over 80% reduction of Rb phosphorylation based on model simulations (Fig.  
 369 4A). We note that the estimate of CycD/Cdk4,6 was based on several assumptions  
 370 (Table S5) and may not be accurate. That said, our experimental observations of the  
 371 phospho-Rb level (S807/S811) across varying KL001 and SR9009 doses (low, medium,  
 372 and high, Fig. 4 B and C) were in good agreement with the model predictions  
 373 considering the estimated CycD/Cdk4,6 activities (Fig. 4A). This ultrasensitive  
 374 decrease of Rb phosphorylation increased the E2f-activation threshold and thus  
 375 deepened quiescence in our model, leading to noticeably fewer cells able to reenter the  
 376 cell cycle upon serum stimulation (Fig. 4D).

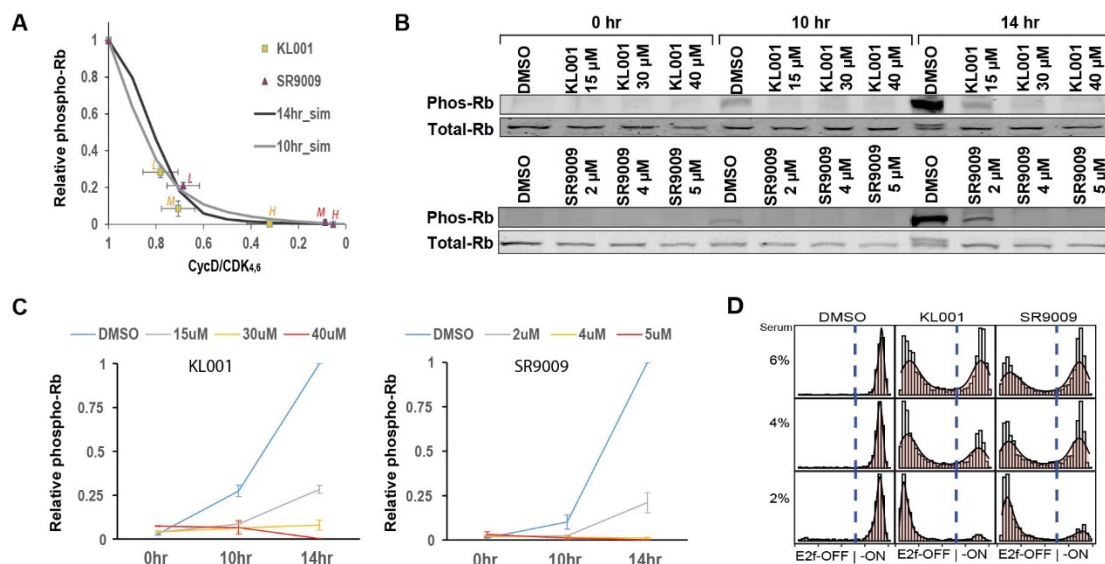

377

378 **Figure 4. Ultrasensitive effects of CycD/Cdk4,6 on Rb phosphorylation and quiescence depth.**  
 379 (A) Relationship between CycD/Cdk4,6 (x-axis) and relative phospho-Rb = (phosphorylated  
 380 Rb)/(total Rb) (y-axis). Model simulated results at the 10-hr (gray curve) and 14-hr (black curve)  
 381 after serum stimulation are shown together with experimentally estimated data points (CycD/Cdk4,6,  
 382 from Table S5; relative phospho-Rb, from C) under the treatments of KL001 (yellow squares) and  
 383 SR9009 (red triangles) at the low (L), medium (M), and high (H) doses, respectively.

384 (B) Effects of Cry and Rev-erb agonists (KL001, top; SR9009, bottom) on Rb phosphorylation.  
385 Quiescent cells were serum (4%) stimulated following the STI.3dq/agonist protocol in the presence  
386 of agonists at the indicated concentrations. The levels of phosphorylated Rb protein (S807/S811)  
387 were measured by Western blot at the 0-, 10-, and 14-hr time points after serum stimulation.  
388 (C) Quantification of the relative phospho-Rb in response to Cry and Rev-erb agonists (KL001, left;  
389 SR9009, right). Levels of phosphorylated Rb and total Rb were quantified from Western blots as in  
390 B. The relative phospho-Rb value of the 14-hr DMSO control is set to 1.0. Error bar, SD.  
391 (D) Stochastic simulations of quiescence exit under the low doses of KL001 (15  $\mu$ M) and SR9009  
392 (2  $\mu$ M). In each panel with the indicated condition, 1000 cells were simulated according to the  
393 relative Phospho-Rb level (14 hr) as in B, and the distribution of simulated E2f molecule numbers  
394 at the 24-hr after stimulation (4% serum) are shown (x-axis).

395

396 CycD/Cdk4,6 activity can be reduced by either downregulating CycD and  
397 Cdk4,6 or upregulating Cdk inhibitors (CKIs), including Cip/Kip proteins (most  
398 notably p21 and p27) and INK4 proteins (most notably p16). In REF/E23 cells treated  
399 with Cry and Rev-erb agonists, the p16 level did not change significantly while the  
400 levels of p21 and p27 mostly decreased but not increased (Fig. S5). These observations  
401 suggest that CKIs are not responsible for CycD/Cdk4,6 downregulation by Cry and  
402 Rev-erb. Since p16 is a marker of senescent cells, that it is not targeted and upregulated  
403 by circadian proteins in quiescent cells was anticipated. Yet, p21 and p27 could be  
404 viable options since they have been shown to drive deep quiescence in different  
405 contexts<sup>21,62</sup>. We suspect that Cry and Rev-erb do not upregulate p21 and p27 to deepen  
406 quiescence is likely due to the specific regulatory mechanisms they employ to modulate  
407 the Rb-E2f bistable switch (see below).

408 Our modeling and experimental study here identified two novel connections  
409 from circadian proteins Cry and Rev-erb converging to downregulate CycD/Cdk4,6.  
410 The natures of these two newly discovered links remain unknown, such as how Cry and  
411 Rev-erb simultaneously downregulate multiple components (CycD1, CycD3, Cdk4 and  
412 Cdk6), and whether such regulations are direct or indirect. Similarly, we observed that  
413 both Cry and Rev-erb agonists reduced total Rb protein level (which would not deepen  
414 quiescence) but did not change the levels of Rb phosphatases PP1 and PP2A (Fig. S5).  
415 How both Cry and Rev-erb converge to similar regulatory patterns targeting a common  
416 subset of Rb-E2f network components are interesting questions that we hope to address  
417 in future studies.

418 As circadian proteins, Cry and Rev-erb levels fluctuate diurnally. Given  
419 upregulating Cry and Rev-erb deepened quiescence as observed in this study, we  
420 speculated that cellular quiescence depth might fluctuate diurnally too. Indeed, this is  
421 what we observed: circadian changes in the rate of quiescence-to-proliferation

422 transition in REF/E23 cells upon growth stimulation (Fig. S6). Further studies are  
423 needed to test and confirm which CycD/Cdk4,6 components fluctuate accordingly and  
424 are responsible for this phenomenon. Also, studies are needed to answer whether  
425 circadian fluctuation of quiescence depth occurs in various body tissues, resulting in  
426 different rates of tissue repair and regeneration at different times of the day. We also  
427 anticipate the differences of targeting CycD/Cdk4,6 and CycE/Cdk2 in regulating  
428 quiescence depth, as found in this study, may have implications in the applications of  
429 Cdk4,6 and Cdk2 inhibitors in clinical settings.



---

430 **MATERIALS AND METHODS**

431 **Cell culture, quiescence induction and exit**

432 Rat embryonic fibroblasts REF52/E23 cells stably harboring an E2f1 promoter-driven  
433 destabilized GFP reporter were derived previously as in <sup>32</sup>. Cells were routinely passed  
434 at a sub-confluent level and cultured in Dulbecco's Modified Eagle's Medium (DMEM)  
435 (No. 31053, Gibco, Thermo Fisher) with 10% of bovine growth serum (BGS, No.  
436 SH30541, Hyclone, GE Healthcare). To induce quiescence, growing cells were seeded  
437 at around 10<sup>5</sup> cells per well in 6-well culture plates (No. 353046, Corning Falcon),  
438 washed twice with DMEM, followed by culture in serum-starvation medium (0.02%  
439 BGS in DMEM) for 2 days or as indicated. To induce quiescence exit, serum-starvation  
440 medium was changed to serum-stimulation medium (DMEM containing serum at the  
441 indicated concentration), and cells were subsequently cultured for the indicated  
442 durations.

443 **Treatments of Cry and Rev-erb agonists**

444 Cry agonists KL001 (No. 233624, EMD Millipore) and KL002 (No. 13879, Cayman)  
445 and Rev-erb agonists SR9009 (No. 554726, Sigma-Aldrich) and SR9011 (No.  
446 SML2067, EMD Millipore) were applied by being included in serum starvation and  
447 stimulation media at the indicated times and concentrations. DMSO was used as a  
448 vehicle control.

449 **E2f activity and quiescence exit (EdU incorporation) Assays**

450 To measure E2f activity in individual cells, cells were harvested at the 24-hr time point  
451 after serum stimulation, fixed with 1% formaldehyde, and the fluorescence intensities  
452 of the E2f-GFP reporter in approximately 10,000 cells from each sample were measured  
453 using a LSR II flow cytometer (BD Bioscience). Flow cytometry data were analyzed  
454 using FlowJo software (v. 10.0). To assay for quiescence exit, EdU (2 μM) was added  
455 to serum-stimulation medium, and cells were collected at the indicated time points,  
456 followed by Click-iT EdU assay according to the manufacturer's instruction.

457 **Ectopic expression**

458 Growing REF/E23 cells were kept at sub-confluence and transfected with pfmh-hCry1  
459 (a gift from Aziz Sancar; Addgene plasmid #25843) and pAdTrack-CMV FLAG Rev-  
460 erba expression vectors (a gift from Bert Vogelstein; Addgene plasmid #16405) for

461 ectopic expression of Cry1 and Rev-erb $\alpha$ , respectively, or with pCMV-mCherry (a gift  
462 from Lingchong You) as a control. Transfection was performed using Neon  
463 electroporation system (MPK5000, Invitrogen, Thermo Fisher) following the  
464 manufacturer's protocol. Briefly, in each transfection, about 10<sup>6</sup> cells were  
465 electroporated with 10  $\mu$ g of plasmid DNA at 1800 volts with two 20-millisecond pulses  
466 in a 100  $\mu$ l Neon tip.

### 467 **Western blotting**

468 Cells were washed with DPBS once and then lysed in lysis buffer (50 mM Tris-HCl,  
469 pH 6.8, 2% sodium deoxycholate, 0.025% Bromophenol blue, 10% glycerol, 5%  $\beta$ -  
470 Mercaptoethanol). Extracted proteins were separated using SDS-PAGE and transferred  
471 onto nitrocellulose membranes. Immunoblot analyses were performed using antibodies  
472 against c-Myc (#sc-40), Rb (#sc-74562), Cyclin D1 (#sc-8396), Cyclin E2 (#sc-  
473 28351), Cdk2 (#sc-6248), Cdk4 (#sc-23896), p21 (#sc-53870), p27 (#sc-1641), PP1  
474 (#sc-7482), and PP2A (#sc-13600) from Santa Cruz; Phospho-Rb ( S807/S811;  
475 #9308T), Cyclin D3 (#2936T), Cyclin E1 (#20808), and Cdk6 (#3136T) from Cell  
476 Signaling; p16 (#ab51243) from Abcam; Tubulin beta (#MAB3408) from EMD  
477 Millipore Corp; and GAPDH (#MA5-15738-D680) from Invitrogen.

### 478 **Model library generation and search**

479 Regulatory effects of Cry or Rev-erb ([CR] in Table S1) on a node  $x$  in the Rb-E2f  
480 network were modeled by adding  $m \cdot w \cdot [CR] / (I + [CR])$  to the ODE  $d[x]/dt$  in our  
481 previously established Rb-E2f bistable switch model [19], with  $m = -1$  (negative  
482 regulation), 0 (no regulation), or +1 (positive regulation);  $w = k_x$  (matching the synthesis  
483 rate constant of  $x$ ), and  $I$  being a random number uniformly distributed in the log range  
484 of 0.01~1.

485 Each of the  $3^5 = 243$  models was simulated with the same set of 10,000 random  
486 parameter sets. With each parameter set, the activity of each node in the Rb-E2f network  
487 was simulated at 50 serum concentrations uniformly distributed in the log range  
488 between 0.01 and 20 (percent of serum, covering the conditions from serum starvation  
489 to saturation). To determine E2f bistability, at each serum concentration, the model with  
490 the initial condition (Table S1) corresponding to the quiescence state was simulated for  
491 1000 model hours to reach the “switch-On” steady state. The “switch-On” steady-state

492 values of individual nodes were then used as the initial condition of the proliferation  
493 state; the model was subsequently simulated for 1000 model hours to reach the “switch-  
494 Off” steady state. Simulation results were analyzed using an “in-house” Perl script,  
495 according to the criteria developed in our previous work<sup>46</sup> to determine E2f bistability.  
496 All simulations were performed using COPASI<sup>63</sup>.

### 497 **Modeling phospho-Rb and CycD/Cdk4,6 downregulations**

498 To simulate the CycD/Cdk4,6 downregulation under Cry and Rev-erb agonists, the  
499 CycD/Cdk4,6 term ([CD], Table S1) in the base model of the Rb-E2f bistable switch<sup>32</sup>  
500 was multiplied with a scaling factor ( $\alpha = 0.1\sim 1$ ); phosphorylated Rb ([RP], Table S1)  
501 and total Rb ([R]+[RE]+[RP], Table S1) were accordingly derived by model simulation.  
502 Reversely, given a decrease in relative phospho-Rb under Cry and Rev-erb agonists as  
503 measured in the experiment, the scaling factor  $\alpha$  of [CD] was derived by simulation and  
504 then applied to simulate the E2f serum response. In the time course simulation of the  
505 base model, the 7-hr model time aligned with the 14-hr experimental time according to  
506 phospho-Rb and E2f-GFP dynamics following serum stimulation. Accordingly, time in  
507 all model simulations was adjusted by 7 hours (e.g., the 17-hr model time was used to  
508 simulate serum responses at the 24-hr).

### 509 **Stochastic simulation**

510 Similar to Ref.<sup>64,65</sup>, we built a Langevin-type stochastic differential equation (SDE)  
511 model based on the ODE model described in Table S1.

$$X_i(t + \tau) = X_i(t) + \sum_{j=1}^M v_{ji} a_j[X(t)]\tau + \theta \sum_{j=1}^M v_{ji} (a_j[X(t)]\tau)^{1/2} \gamma + \delta \omega \tau^{1/2}$$

512 where  $X(t) = (X_1(t), \dots, X_n(t))$  is the system state at time  $t$ .  $X_i(t)$  is the molecule  
513 number of species  $i$  ( $i = 1, \dots, n$ ) at time  $t$ . The time evolution of the system is  
514 measured based on the rates  $a_j[X(t)]$  ( $j = 1, \dots, M$ ) with the corresponding change of  
515 molecule number  $i$  described in  $v_{ji}$ . Factors  $\gamma$  and  $\omega$  are two independent and  
516 uncorrelated Gaussian noises. In this equation, the first two terms indicate deterministic  
517 kinetics, the third and fourth terms represent intrinsic and extrinsic noise, respectively.  
518  $\theta$  and  $\delta$  are scaling factors to adjust the levels of intrinsic and extrinsic noise,  
519 respectively ( $\theta=0.45, \delta=30$ ). Units of model parameters and species concentrations in  
520 the ODE model (Table S2) were converted to molecule numbers. We considered the  
521 cell reenters the cell cycle with the E2f-ON state, when the E2f molecule number at the

522 24<sup>th</sup> hour after serum stimulation was larger than a cutoff value of 200. All SDEs were  
523 implemented and solved in Matlab.

524

525

526

527

528

### 529 **ACKNOWLEDGEMENTS**

530 We thank Kotaro Fujimaki, Xiaojun Tian, and Tongli Zhang for critical readings and  
531 comments on the manuscript. This work was supported by grants from the NSF  
532 (#1463137 and 2034210 to GY) and NIH (GM-084905, a T32 fellowship to JSK) of  
533 the U.S.A., and the NSF of China (#31500676 to XW).

534

535

536

## REFERENCES

- 537 1. Coller, H.A., Sang, L. & Roberts, J.M. A new description of cellular quiescence. *PLoS Biol* **4**,  
538 e83 (2006).
- 539 2. Cheung, T.H. & Rando, T.A. Molecular regulation of stem cell quiescence. *Nat Rev Mol Cell*  
540 *Biol* **14**, 329-340 (2013).
- 541 3. Rumman, M., Dhawan, J. & Kassem, M. Concise Review: Quiescence in Adult Stem Cells:  
542 Biological Significance and Relevance to Tissue Regeneration. *Stem Cells* **33**, 2903-2912  
543 (2015).
- 544 4. Bouchard-Cannon, P., Mendoza-Viveros, L., Yuen, A., Kaern, M. & Cheng, H.Y. The circadian  
545 molecular clock regulates adult hippocampal neurogenesis by controlling the timing of cell-  
546 cycle entry and exit. *Cell Rep* **5**, 961-973 (2013).
- 547 5. Gengatharan, A. *et al.* Adult neural stem cell activation in mice is regulated by the day/night  
548 cycle and intracellular calcium dynamics. *Cell* **184**, 709-722. e713 (2021).
- 549 6. Janich, P. *et al.* The circadian molecular clock creates epidermal stem cell heterogeneity.  
550 *Nature* **480**, 209-214 (2011).
- 551 7. Panda, S. *et al.* Coordinated transcription of key pathways in the mouse by the circadian  
552 clock. *Cell* **109**, 307-320 (2002).
- 553 8. Ueda, H.R. *et al.* A transcription factor response element for gene expression during  
554 circadian night. *Nature* **418**, 534-539 (2002).
- 555 9. Storch, K.F. *et al.* Extensive and divergent circadian gene expression in liver and heart. *Nature*  
556 **417**, 78-83 (2002).
- 557 10. Sancar, A. & Van Gelder, R.N. Clocks, cancer, and chronochemotherapy. *Science* **371** (2021).
- 558 11. Takahashi, J.S. Transcriptional architecture of the mammalian circadian clock. *Nat Rev Genet*  
559 **18**, 164-179 (2017).
- 560 12. Hong, C.I. *et al.* Circadian rhythms synchronize mitosis in *Neurospora crassa*. *Proc Natl Acad*  
561 *Sci U S A* **111**, 1397-1402 (2014).
- 562 13. Yang, Q., Pando, B.F., Dong, G., Golden, S.S. & van Oudenaarden, A. Circadian gating of the  
563 cell cycle revealed in single cyanobacterial cells. *Science* **327**, 1522-1526 (2010).
- 564 14. Bieler, J. *et al.* Robust synchronization of coupled circadian and cell cycle oscillators in single  
565 mammalian cells. *Mol Syst Biol* **10**, 739 (2014).
- 566 15. Feillet, C. *et al.* Phase locking and multiple oscillating attractors for the coupled mammalian  
567 clock and cell cycle. *Proc Natl Acad Sci U S A* **111**, 9828-9833 (2014).
- 568 16. Liu, Z. *et al.* Circadian regulation of c-MYC in mice. *Proc Natl Acad Sci U S A* **117**, 21609-21617  
569 (2020).
- 570 17. Fu, L., Pelicano, H., Liu, J., Huang, P. & Lee, C. The circadian gene *Period2* plays an important  
571 role in tumor suppression and DNA damage response in vivo. *Cell* **111**, 41-50 (2002).
- 572 18. Gréchez-Cassiau, A., Rayet, B., Guillaumond, F., Teboul, M. & Delaunay, F. The circadian clock  
573 component *BMAL1* is a critical regulator of *p21WAF1/CIP1* expression and hepatocyte  
574 proliferation. *Journal of Biological Chemistry* **283**, 4535-4542 (2008).
- 575 19. Matsuo, T. *et al.* Control mechanism of the circadian clock for timing of cell division in vivo.  
576 *Science* **302**, 255-259 (2003).
- 577 20. Sahar, S. & Sassone-Corsi, P. Metabolism and cancer: the circadian clock connection. *Nat Rev*  
578 *Cancer* **9**, 886-896 (2009).
- 579 21. Kwon, J.S. *et al.* Controlling Depth of Cellular Quiescence by an Rb-E2F Network Switch. *Cell*  
580 *Rep* **20**, 3223-3235 (2017).
- 581 22. Brooks, R.F., Richmond, F.N., Riddle, P.N. & Richmond, K.M. Apparent heterogeneity in the  
582 response of quiescent swiss 3T3 cells to serum growth factors: implications for the transition  
583 probability model and parallels with "cellular senescence" and "competence". *J Cell Physiol*  
584 **121**, 341-350 (1984).
- 585 23. Fujimaki, K. *et al.* Graded regulation of cellular quiescence depth between proliferation and  
586 senescence by a lysosomal dimmer switch. *Proceedings of the National Academy of Sciences*  
587 **116**, 22624-22634 (2019).
- 588 24. Augenlicht, L.H. & Baserga, R. Changes in the G0 state of WI-38 fibroblasts at different times  
589 after confluence. *Exp Cell Res* **89**, 255-262 (1974).
- 590 25. Bucher, N.L. Regeneration of Mammalian Liver. *Int Rev Cytol* **15**, 245-300 (1963).

- 591 26. Roth, G.S. & Adelman, R.C. Age-dependent regulation of mammalian DNA synthesis and cell  
592 division in vivo by glucocorticoids. *Exp Gerontol* **9**, 27-31 (1974).
- 593 27. Yanez, I. & O'Farrell, M. Variation in the length of the lag phase following serum  
594 restimulation of mouse 3T3 cells. *Cell Biol Int Rep* **13**, 453-462 (1989).
- 595 28. Rodgers, J.T. *et al.* mTORC1 controls the adaptive transition of quiescent stem cells from G0  
596 to G(Alert). *Nature* **510**, 393-396 (2014).
- 597 29. Llorens-Bobadilla, E. *et al.* Single-Cell Transcriptomics Reveals a Population of Dormant  
598 Neural Stem Cells that Become Activated upon Brain Injury. *Cell Stem Cell* **17**, 329-340  
599 (2015).
- 600 30. Rodgers, J.T., Schroeder, M.D., Ma, C. & Rando, T.A. HGFA is an injury-regulated systemic  
601 factor that induces the transition of stem cells into GAlert. *Cell reports* **19**, 479-486 (2017).
- 602 31. Lee, G. *et al.* Fully reduced HMGB1 accelerates the regeneration of multiple tissues by  
603 transitioning stem cells to GAlert. *Proc Natl Acad Sci U S A* **115**, E4463-E4472 (2018).
- 604 32. Yao, G., Lee, T.J., Mori, S., Nevins, J.R. & You, L. A bistable Rb-E2F switch underlies the  
605 restriction point. *Nat Cell Biol* **10**, 476-482 (2008).
- 606 33. Wang, X. *et al.* Exit from quiescence displays a memory of cell growth and division. *Nat*  
607 *Commun* **8**, 321 (2017).
- 608 34. Wu, L. *et al.* The E2F1-3 transcription factors are essential for cellular proliferation. *Nature*  
609 **414**, 457-462 (2001).
- 610 35. Johnson, D.G., Schwarz, J.K., Cress, W.D. & Nevins, J.R. Expression of transcription factor  
611 E2F1 induces quiescent cells to enter S phase. *Nature* **365**, 349-352 (1993).
- 612 36. Yao, G. Modelling mammalian cellular quiescence. *Interface Focus* **4**, 20130074 (2014).
- 613 37. Cappell, S.D., Chung, M., Jaimovich, A., Spencer, S.L. & Meyer, T. Irreversible APCCdh1  
614 inactivation underlies the point of no return for cell-cycle entry. *Cell* **166**, 167-180 (2016).
- 615 38. Cappell, S.D. *et al.* EMI1 switches from being a substrate to an inhibitor of APC/C CDH1 to  
616 start the cell cycle. *Nature* **558**, 313-317 (2018).
- 617 39. Leung, J.Y., Ehmann, G.L., Giangrande, P.H. & Nevins, J.R. A role for Myc in facilitating  
618 transcription activation by E2F1. *Oncogene* **27**, 4172-4179 (2008).
- 619 40. Hirota, T. *et al.* Identification of small molecule activators of cryptochrome. *Science* **337**,  
620 1094-1097 (2012).
- 621 41. Calzone, L., Gelay, A., Zinovyev, A., Radvanyi, F. & Barillot, E. A comprehensive modular map  
622 of molecular interactions in RB/E2F pathway. *Mol Syst Biol* **4**, 173 (2008).
- 623 42. Sears, R.C. & Nevins, J.R. Signaling networks that link cell proliferation and cell fate. *Journal*  
624 *of Biological Chemistry* **277**, 11617-11620 (2002).
- 625 43. Attwooll, C., Lazzarini Denchi, E. & Helin, K. The E2F family: specific functions and  
626 overlapping interests. *EMBO J* **23**, 4709-4716 (2004).
- 627 44. Frolov, M.V. & Dyson, N.J. Molecular mechanisms of E2F-dependent activation and pRB-  
628 mediated repression. *J Cell Sci* **117**, 2173-2181 (2004).
- 629 45. Weinberg, R.A. The retinoblastoma protein and cell cycle control. *Cell* **81**, 323-330 (1995).
- 630 46. Yao, G., Tan, C., West, M., Nevins, J.R. & You, L. Origin of bistability underlying mammalian  
631 cell cycle entry. *Mol Syst Biol* **7**, 485 (2011).
- 632 47. Ma, W., Lai, L., Ouyang, Q. & Tang, C. Robustness and modular design of the Drosophila  
633 segment polarity network. *Mol Syst Biol* **2**, 70 (2006).
- 634 48. Ma, W., Trusina, A., El-Samad, H., Lim, W.A. & Tang, C. Defining network topologies that can  
635 achieve biochemical adaptation. *Cell* **138**, 760-773 (2009).
- 636 49. Arora, M., Moser, J., Phadke, H., Basha, A.A. & Spencer, S.L. Endogenous Replication Stress in  
637 Mother Cells Leads to Quiescence of Daughter Cells. *Cell Rep* **19**, 1351-1364 (2017).
- 638 50. Barr, A.R. *et al.* DNA damage during S-phase mediates the proliferation-quiescence decision  
639 in the subsequent G1 via p21 expression. *Nat Commun* **8**, 14728 (2017).
- 640 51. Laurenti, E. *et al.* CDK6 levels regulate quiescence exit in human hematopoietic stem cells.  
641 *Cell Stem Cell* **16**, 302-313 (2015).
- 642 52. Yang, H.W., Chung, M., Kudo, T. & Meyer, T. Competing memories of mitogen and p53  
643 signalling control cell-cycle entry. *Nature* **549**, 404-408 (2017).
- 644 53. Min, M., Rong, Y., Tian, C. & Spencer, S.L. Temporal integration of mitogen history in mother  
645 cells controls proliferation of daughter cells. *Science* **368**, 1261-1265 (2020).
- 646 54. Narasimha, A.M. *et al.* Cyclin D activates the Rb tumor suppressor by mono-phosphorylation.  
647 *Elife* **3** (2014).

- 
- 648 55. Pennycook, B.R. & Barr, A.R. Restriction point regulation at the crossroads between  
649 quiescence and cell proliferation. *FEBS letters* **594**, 2046-2060 (2020).  
650 56. Schwarz, C. *et al.* A precise Cdk activity threshold determines passage through the restriction  
651 point. *Molecular cell* **69**, 253-264. e255 (2018).  
652 57. Stallaert, W., Kedziora, K.M., Chao, H.X. & Purvis, J.E. Bistable switches as integrators and  
653 actuators during cell cycle progression. *FEBS letters* **593**, 2805-2816 (2019).  
654 58. Brooks, R.F. Cell cycle commitment and the origins of cell cycle variability. *Frontiers in Cell*  
655 *and Developmental Biology* **9**, 1891 (2021).  
656 59. Matson, J.P. & Cook, J.G. Cell cycle proliferation decisions: the impact of single cell analyses.  
657 *FEBS J* **284**, 362-375 (2017).  
658 60. Novák, B. & Tyson, J.J. Mechanisms of signalling-memory governing progression through the  
659 eukaryotic cell cycle. *Current Opinion in Cell Biology* **69**, 7-16 (2021).  
660 61. Goldbeter, A. & Koshland, D.E., Jr. An amplified sensitivity arising from covalent modification  
661 in biological systems. *Proc Natl Acad Sci U S A* **78**, 6840-6844 (1981).  
662 62. Overton, K.W., Spencer, S.L., Noderer, W.L., Meyer, T. & Wang, C.L. Basal p21 controls  
663 population heterogeneity in cycling and quiescent cell cycle states. *Proc Natl Acad Sci U S A*  
664 **111**, E4386-4393 (2014).  
665 63. Hoops, S. *et al.* COPASI: a COMplex PATHway Simulator. *Bioinformatics* **22**, 3067-3074 (2006).  
666 64. Lee, T.J., Yao, G., Bennett, D.C., Nevins, J.R. & You, L. Stochastic E2F activation and  
667 reconciliation of phenomenological cell-cycle models. *PLoS Biol* **8** (2010).  
668 65. Gillespie, D.T. The chemical Langevin equation. *The Journal of Chemical Physics* **113**, 297-306  
669 (2000).  
670 66. Dengler, W.A., Schulte, J., Berger, D.P., Mertelsmann, R. & Fiebig, H.H. Development of a  
671 propidium iodide fluorescence assay for proliferation and cytotoxicity assays. *Anticancer*  
672 *Drugs* **6**, 522-532 (1995).  
673 67. Phillips, N.E. *et al.* The circadian oscillator analysed at the single-transcript level. *Molecular*  
674 *systems biology* **17**, e10135 (2021).  
675  
676

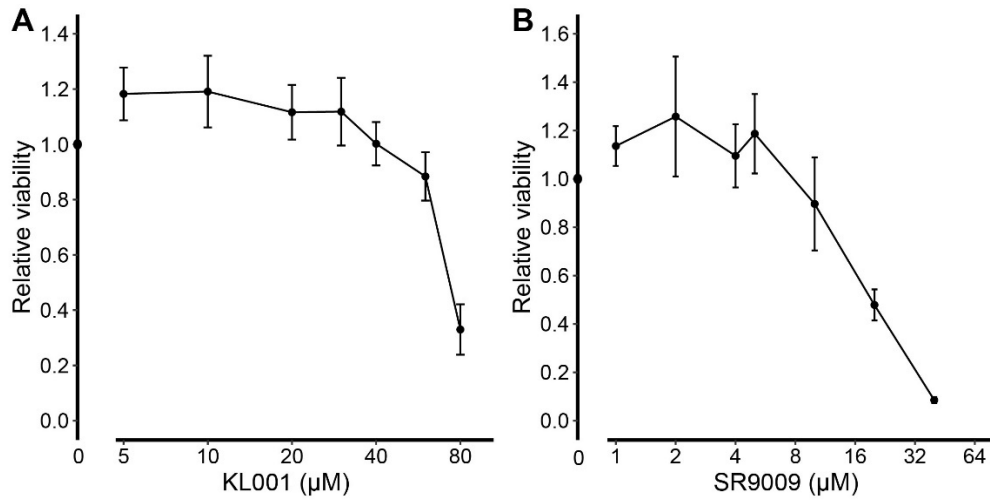

677  
678  
679  
680  
681  
682  
683  
684

**Figure S1. Cytotoxicity of Cry and Rev-erb agonists in REF52/E23 cells.** Cells were treated with Cry agonist KL001 (A) and Rev-erb agonist SR90009 (B), respectively, at the indicated concentrations for 48 hours (concentration = 0 being the DMSO vehicle control). Relative viability (y-axis) refers to the ratio of the live cell count in a treated sample over that in the DMSO control. Live cell count was determined by the PI fluorescence assay as previously described <sup>66</sup>. Error bar, SD (n = 3).



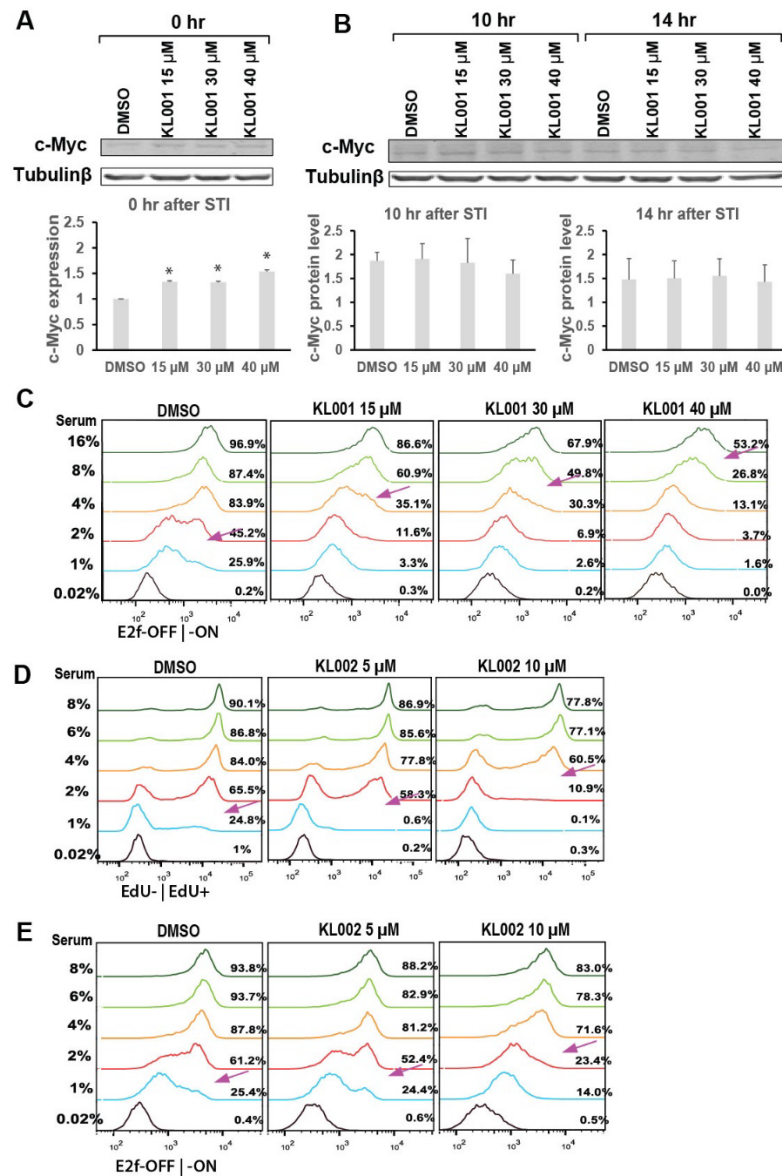

685

686 **Figure S2. Cry agonists induce cells into deeper quiescence.**

687 (A-B) Effect of Cry agonist KL001 on Myc protein level. Quiescent cells were serum (4%)  
 688 stimulated following the STI.3dq/agonist protocol in the presence of KL001 at the indicated  
 689 concentrations. The protein levels of c-Myc were assessed by Western blot at (A) the 0 hr, i.e., in  
 690 quiescent cells, and (B) the 10- and 14-hr time points after serum stimulation (STI). Error bar, SEM  
 691 (n = 2). \*p < 0.05.

692 (C) Effect of KL001 on quiescence depth. Quiescent cells were serum stimulated following the  
 693 STI.3dq/agonist protocol. Serum and KL001 concentrations are as indicated. The percentages of  
 694 cells with E2f-ON at the 24-hr after serum stimulation are indicated to the right of individual  
 695 histograms. Arrows indicate the approximate serum concentrations leading to E2f-ON% = 45%.

696 (D-E) Effect of Cry agonist KL002 on quiescence depth. Quiescent cells were serum stimulated  
 697 following the STI.3dq/agonist protocol. Serum and KL002 concentrations are as indicated. The  
 698 EdU+% at the 30-hr (D) and the E2f-ON% at the 24-hr (E) after serum stimulation are indicated to  
 699 the right of individual histograms. Arrows indicate the approximate serum concentrations leading  
 700 to EdU+% (D) and E2f-ON% (E) = 45%, respectively.

701

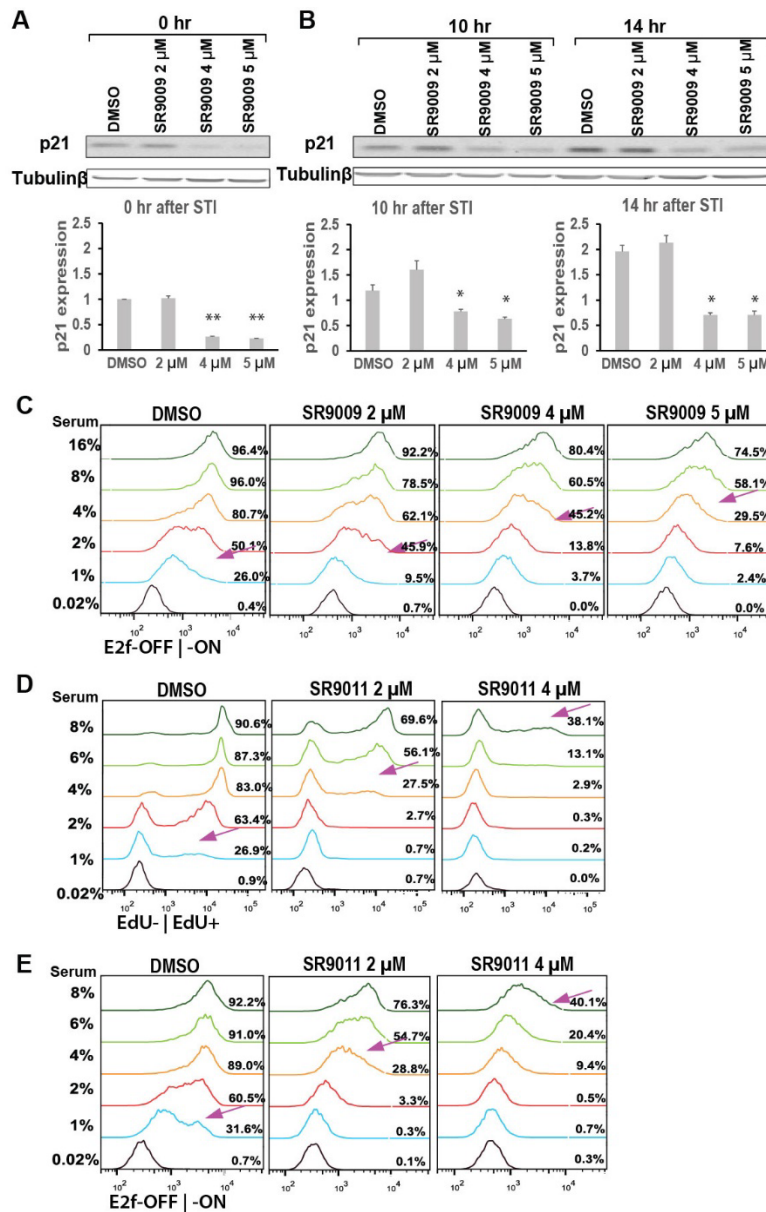

702

703 **Figure S3. Rev-erb agonists induce cells into deeper quiescence.**

704 (A-B) Effect of Rev-erb agonist SR9009 on p21 protein level. Quiescent cells were serum (4%)  
 705 stimulated following the STI.3dq/agonist protocol in the presence of SR9009 at the indicated  
 706 concentrations. The protein levels of p21 were measured by Western blot at (A) the 0 hr (i.e., in  
 707 quiescent cells), and (B) the 10- and 14-hr after serum stimulation (STI). Error bar, SEM (n = 2).  
 708 \*p < 0.05.

709 (C) Effect of SR9009 on quiescence depth. Quiescent cells were serum stimulated following the  
 710 STI.3dq/agonist protocol. Serum and SR9009 concentrations are as indicated. E2f-ON% at the 24-  
 711 hr after serum stimulation are indicated to the right of individual histograms. Arrows indicate the  
 712 approximate serum concentrations leading to E2f-ON% = 45%.

713 (D-E) Effect of Rev-erb agonist SR9011 on quiescence depth. Quiescent cells were stimulated  
 714 following the STI.3dq/agonist protocol. Serum and SR9011 concentrations are as indicated. The  
 715 EdU+% at the 30-hr (D) and the E2f-ON% at the 24-hr (E) after serum stimulation are indicated to  
 716 the right of individual histograms. Arrows indicate the approximate serum concentrations leading  
 717 to EdU+% (D) and E2f-ON% (E) = 45%, respectively.

718

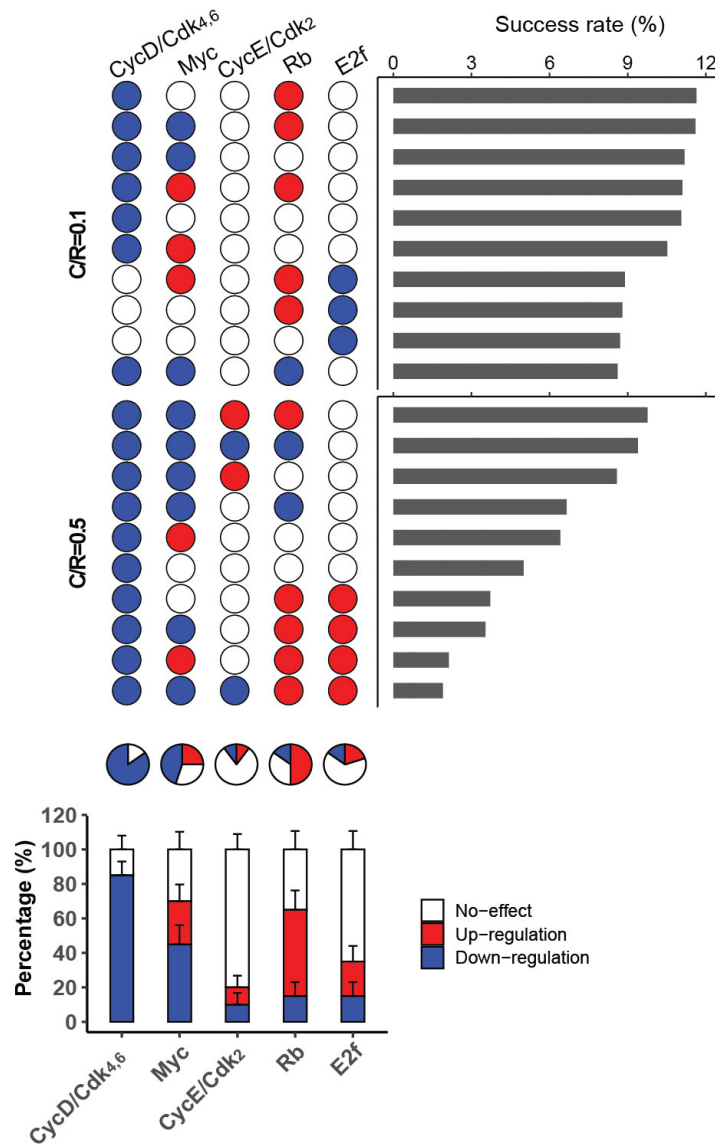

719  
720  
721  
722  
723  
724  
725

**Figure S4. Link features of the 10 top-ranked models at each C/R level.** (Top) The top 10 models at  $C/R = 0.1$  and  $0.5$ , respectively. The link features in each model are shown according to the upregulation (red), downregulation (blue), or no-effect (white) of the indicated target node by  $C/R$ . (Middle) Pie chart of the percentage of each link feature at the indicated target node among the combined 20 models (top). (Bottom) The average percentage of each link feature at the indicated target node between the two model groups ( $C/R = 0.1$  and  $0.5$ , respectively, top). Error bar, SD.

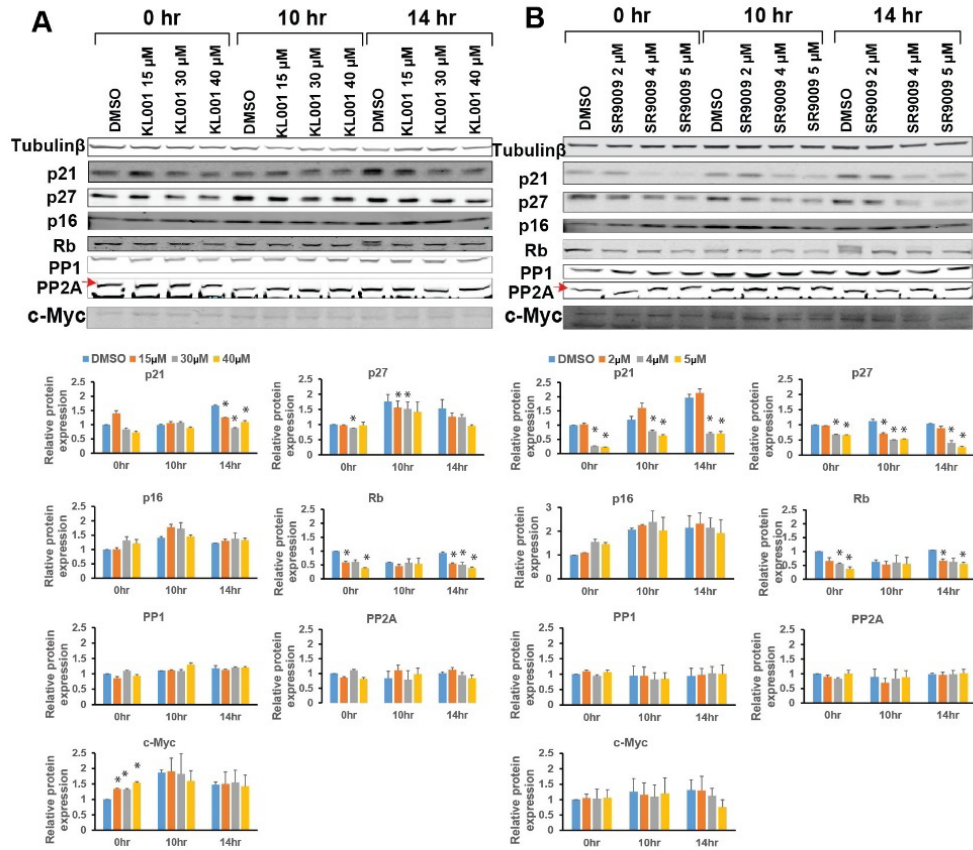

726

727 **Figure S5. Western blot analysis of multiple Rb-E2f network proteins in response to Cry and**  
 728 **Rev-erb agonists.**

729 The responses of indicated Rb-E2f network proteins to Cry agonist KL001 (A) and Rev-erb agonist  
 730 SR9009 (B) at the indicated concentrations were measured following the STI.3dq/agonist protocol.  
 731 Protein levels were measured by Western blot in quiescence (0 hr) and during cell cycle entry (10  
 732 and 14 hr after stimulated with 4% serum) and normalized to the 0-hr DMSO control. Error bar,  
 733 SEM (n=2); \*p < 0.05.  
 734

735  
736  
737

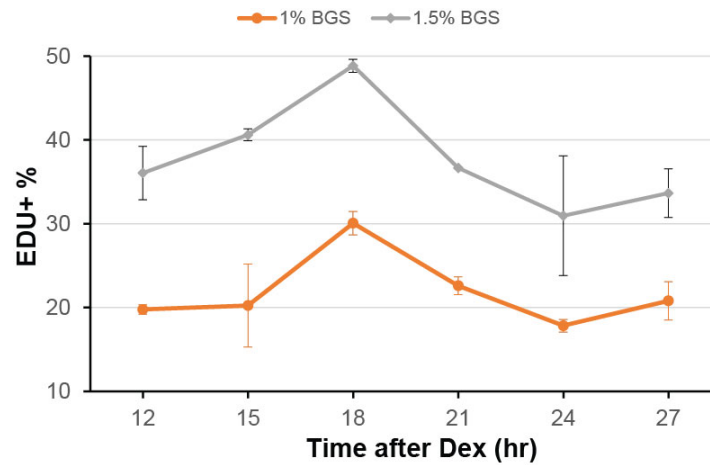

738

739 **Figure S6. Circadian changes of quiescence depth.**

740 Quiescent (2-day serum-starved) cells were circadian-synchronized with dexamethasone (Dex, 100  
741 nM) treatment for 2 hours followed by 12 hours of stabilization time (as in <sup>67</sup>). Cells were  
742 subsequently, and every 3 hours afterward, stimulated with serum (1% and 1.5%, respectively) for  
743 30 hours, followed by the measurement of EdU+%. Error bar, SEM ( $n \geq 2$ ).

- 744 **Table S1.** Rb-E2f bistable switch model with circadian regulation.
- 745 **Table S2.** Model parameters.
- 746 **Table S3.** Ranking for the top 10 topologies at the low level of C/R (= 0.1).
- 747 **Table S4.** Ranking for the top 10 topologies at the high level of C/R (= 0.5).
- 748 **Table S5.** Estimation of CycD/Cdk4,6 activity under KL001 and SR9009 treatments.

**Table S1.** The Rb-E2f bistable switch model with circadian regulation (adapted from Ref. 1).

|                                                                                                                                                                                                                                                                                  |
|----------------------------------------------------------------------------------------------------------------------------------------------------------------------------------------------------------------------------------------------------------------------------------|
| $\frac{d[M]}{dt} = \frac{k_M[S]}{K_S + [S]} + \frac{m_1 \cdot w_1 \cdot [CR]}{I_1 + [CR]} - d_M[M]$                                                                                                                                                                              |
| $\frac{d[CD]}{dt} = \frac{k_{CD}[M]}{K_M + [M]} + \frac{k_{CDS}[S]}{K_S + [S]} + \frac{m_2 \cdot w_2 \cdot [CR]}{I_2 + [CR]} - d_{CD}[CD]$                                                                                                                                       |
| $\frac{d[R]}{dt} = k_R + \frac{m_3 \cdot w_3 \cdot [CR]}{I_3 + [CR]} + \frac{k_{DP}[RP]}{K_{RP} + [RP]} - k_{RE}[R][E] - \frac{k_{P1}[CD][R]}{K_{CD} + [R]} - \frac{k_{P2}[CE][R]}{K_{CE} + [R]} - d_R[R]$                                                                       |
| $\frac{d[CE]}{dt} = \frac{k_{CE}[E]}{K_E + [E]} + \frac{m_4 \cdot w_4 \cdot [CR]}{I_4 + [CR]} - d_{CE}[CE]$                                                                                                                                                                      |
| $\frac{d[E]}{dt} = k_E \left( \frac{[M]}{K_M + [M]} \right) \left( \frac{[E]}{K_E + [E]} \right) + \frac{k_b[M]}{K_M + [M]} + \frac{m_5 \cdot w_5 \cdot [CR]}{I_5 + [CR]} + \frac{k_{P1}[CD][RE]}{K_{CD} + [RE]} + \frac{k_{P2}[CE][RE]}{K_{CE} + [RE]} - k_{RE}[R][E] - d_E[E]$ |
| $\frac{d[RP]}{dt} = \frac{k_{P1}[CD][R]}{K_{CD} + [R]} + \frac{k_{P2}[CE][R]}{K_{CE} + [R]} + \frac{k_{P1}[CD][RE]}{K_{CD} + [RE]} + \frac{k_{P2}[CE][RE]}{K_{CE} + [RE]} - \frac{k_{DP}[RP]}{K_{RP} + [RP]} - d_{RP}[RP]$                                                       |
| $\frac{d[RE]}{dt} = k_{RE}[R][E] - \frac{k_{P1}[CD][RE]}{K_{CD} + [RE]} - \frac{k_{P2}[CE][RE]}{K_{CE} + [RE]} - d_{RE}[RE]$                                                                                                                                                     |

Variables:

*S*: serum concentration

*M*: Myc

*E*: E2F

*CD*: Cyclin D/Cdk4,6

*CE*: Cyclin E/Cdk2

*R*: Rb family proteins

*RP*: Phosphorylated Rb

*RE*: Rb-E2F complex

*CR*: Cry or Rev-erb

Initial condition:

$[M] = [E] = [CD] = [CE] = [R] = [RP] = 0$  nM,  $[RE] = 0.55$  nM,  $[CR] = 0.1$  or  $0.5$  nM.

Note: Model parameters are adapted from Ref. 1 and defined in Table S2 (including newly added parameters  $m_{1-5}$ ,  $w_{1-5}$ , and  $I_{1-5}$ ).

**Table S2.** Model parameters (adapted from Ref. 1)

| Symbol    | Values                                | Description                                                             |
|-----------|---------------------------------------|-------------------------------------------------------------------------|
| $k_M$     | 1.0 nM hr <sup>-1</sup>               | Rate constant of Myc synthesis driven by growth factors                 |
| $k_E$     | 0.4 nM hr <sup>-1</sup>               | Rate constant of E2F synthesis driven by Myc and E2F                    |
| $k_b$     | 0.003 nM hr <sup>-1</sup>             | Rate constant of E2F synthesis driven by Myc alone                      |
| $k_{CD}$  | 0.03 nM hr <sup>-1</sup>              | Rate constant of CycD synthesis driven by Myc                           |
| $k_{CDS}$ | 0.45 nM hr <sup>-1</sup>              | Rate constant of CycD synthesis driven by growth factors                |
| $k_{CE}$  | 0.35 nM hr <sup>-1</sup>              | Rate constant of CycE synthesis driven by E2F                           |
| $k_R$     | 0.18 nM hr <sup>-1</sup>              | Rate constant of Rb constitutive synthesis                              |
| $k_{P1}$  | 18 hr <sup>-1</sup>                   | Phosphorylation rate constant of Rb by CycD/Cdk4,6                      |
| $k_{P2}$  | 18 hr <sup>-1</sup>                   | Phosphorylation rate constant of Rb by CycE/Cdk2                        |
| $k_{DP}$  | 3.6 nM hr <sup>-1</sup>               | Dephosphorylation rate constant of Rb by phosphatases                   |
| $k_{RE}$  | 180 nM <sup>-1</sup> hr <sup>-1</sup> | Association rate constant of Rb and E2F                                 |
| $K_S$     | 0.5 nM                                | Michaelis-Menten parameter for CycD and Myc synthesis by growth factors |
| $K_E$     | 0.15 nM                               | Michaelis-Menten parameter for CycE and E2F synthesis by E2F            |
| $K_M$     | 0.15 nM                               | Michaelis-Menten parameter for CycD and E2F synthesis by Myc            |
| $K_{RP}$  | 0.01 nM                               | Michaelis-Menten parameter for Rb dephosphorylation                     |
| $K_{CD}$  | 0.92 nM                               | Michaelis-Menten parameter for Rb phosphorylation by CycD/Cdk4,6        |
| $K_{CE}$  | 0.92 nM                               | Michaelis-Menten parameter for Rb phosphorylation by CycE/Cdk2          |
| $d_M$     | 0.7 hr <sup>-1</sup>                  | Degradation rate constant of Myc                                        |
| $d_E$     | 0.25 hr <sup>-1</sup>                 | Degradation rate constant of E2F                                        |
| $d_{CD}$  | 1.5 hr <sup>-1</sup>                  | Degradation rate constant of CycD                                       |
| $d_{CE}$  | 1.5 hr <sup>-1</sup>                  | Degradation rate constant of CycE                                       |
| $d_R$     | 0.06 hr <sup>-1</sup>                 | Degradation rate constant of Rb                                         |
| $d_{RP}$  | 0.06 hr <sup>-1</sup>                 | Degradation rate constant of phosphorylated Rb                          |
| $d_{RE}$  | 0.03 hr <sup>-1</sup>                 | Degradation rate constant of Rb-E2F complex                             |
| $m_1$     | 0, -1, or +1                          | CR activate, inhibit, or have no effect on $M$                          |
| $m_2$     | 0, -1, or +1                          | CR activate, inhibit, or have no effect on $CD$                         |
| $m_3$     | 0, -1, or +1                          | CR activate, inhibit, or have no effect on $R$                          |
| $m_4$     | 0, -1, or +1                          | CR activate, inhibit, or have no effect on $CE$                         |
| $m_5$     | 0, -1, or +1                          | CR activate, inhibit, or have no effect on $E$                          |
| $w_1$     | 1.0 nM hr <sup>-1</sup>               | Rate constant of CR effect on $M$ (matching the $k_m$ value)            |
| $w_2$     | 0.45 nM hr <sup>-1</sup>              | Rate constant of CR effect on $CD$ (matching the $k_{CDS}$ value)       |
| $w_3$     | 0.18 nM hr <sup>-1</sup>              | Rate constant of CR effect on $R$ (matching the $k_R$ value)            |
| $w_4$     | 0.35 nM hr <sup>-1</sup>              | Rate constant of CR effect on $CE$ (matching the $k_{CE}$ value)        |
| $w_5$     | 0.4 nM hr <sup>-1</sup>               | Rate constant of CR effect on $E$ (matching the $k_E$ value)            |
| $I_1$     | 0.01 ~ 1 nM                           | Random Michaelis-Menten parameter for CR effect on $M$                  |
| $I_2$     | 0.01 ~ 1 nM                           | Random Michaelis-Menten parameter for CR effect on $CD$                 |
| $I_3$     | 0.01 ~ 1 nM                           | Random Michaelis-Menten parameter for CR effect on $R$                  |
| $I_4$     | 0.01 ~ 1 nM                           | Random Michaelis-Menten parameter for CR effect on $CE$                 |
| $I_5$     | 0.01 ~ 1 nM                           | Random Michaelis-Menten parameter for CR effect on $E$                  |



**Table S3.** Ranking of the top 10 topologies at the low level of C/R (= 0.1).

| Topology | 1250 Sim | 2500 Sim | 3750 Sim | 5000 Sim | 6250 Sim | 7500 Sim | 8750 Sim | 10,000 Sim |
|----------|----------|----------|----------|----------|----------|----------|----------|------------|
| #64      | 1        | 1        | 2        | 2        | 1        | 1        | 2        | 1          |
| #226     | 2        | 2        | 1        | 1        | 2        | 2        | 1        | 2          |
| #217     | 4        | 4        | 3        | 3        | 3        | 5        | 3        | 3          |
| #145     | 3        | 5        | 5        | 5        | 5        | 3        | 4        | 4          |
| #55      | 5        | 3        | 4        | 4        | 4        | 4        | 5        | 5          |
| #136     | 6        | 6        | 6        | 6        | 6        | 6        | 6        | 6          |
| #93      | 7        | 7        | 8        | 9        | 7        | 7        | 7        | 7          |
| #12      | 8        | 9        | 9        | 11       | 9        | 8        | 8        | 8          |
| #3       | 10       | 8        | 7        | 7        | 8        | 9        | 9        | 9          |
| #235     | 9        | 13       | 11       | 8        | 10       | 10       | 10       | 10         |

A total of 10,000 model simulations (Sim) were evenly divided into 8 bins (1250 Sim in each bin). The ranking of each topology (model number shown in the 1<sup>st</sup> column) was updated after each bin addition (i.e., after 1250, 2500, ..., 10,000 Sim).

**Table S4.** Ranking of the top 10 topologies at the high level of C/R (= 0.5).

| Topology | 1250 Sim | 2500 Sim | 3750 Sim | 5000 Sim | 6250 Sim | 7500 Sim | 8750 Sim | 10,000 Sim |
|----------|----------|----------|----------|----------|----------|----------|----------|------------|
| #229     | 2        | 2        | 1        | 1        | 1        | 1        | 1        | 1          |
| #241     | 1        | 1        | 2        | 2        | 2        | 2        | 2        | 2          |
| #220     | 3        | 3        | 3        | 3        | 3        | 3        | 3        | 3          |
| #235     | 5        | 5        | 5        | 5        | 5        | 4        | 4        | 4          |
| #136     | 4        | 4        | 4        | 4        | 4        | 5        | 5        | 5          |
| #55      | 6        | 6        | 6        | 6        | 6        | 6        | 6        | 6          |
| #65      | 8        | 7        | 7        | 7        | 7        | 7        | 7        | 7          |
| #227     | 7        | 8        | 8        | 8        | 8        | 8        | 8        | 8          |
| #146     | 10       | 9        | 10       | 9        | 9        | 9        | 9        | 9          |
| #233     | 9        | 10       | 11       | 10       | 10       | 10       | 10       | 10         |

See Table S3 legend for detail.

**Table S5.** Estimation of CycD/Cdk4,6 activity under KL001 and SR9009 treatments.

| <b>KL001</b>                                    |         |       |         |         |         |         |         |                   |                   |          |      |                |      |
|-------------------------------------------------|---------|-------|---------|---------|---------|---------|---------|-------------------|-------------------|----------|------|----------------|------|
| treatment (rep 1)                               | CycD1   | CycD3 | Cdk4    | Cdk6    | p21     | p27     | p16     | JA (w/o adj. exp) | JA' (w/ adj. exp) | Mean JA' | sd   | normalized JA' | sd   |
| DMSO                                            | 3.59    | 0.90  | 1.22    | 2.29    | 1.33    | 1.91    | 1.33    | 2.58              | 4.66              | 4.96     | 0.43 | <b>1.00</b>    | 0.00 |
| KL001 15uM                                      | 3.15    | 0.71  | 1.14    | 1.43    | 1.13    | 1.58    | 1.53    | 1.76              | 3.99              | 3.88     | 0.16 | <b>0.78</b>    | 0.07 |
| KL001 30uM                                      | 2.53    | 0.53  | 1.18    | 1.14    | 1.01    | 1.54    | 1.56    | 1.30              | 3.38              | 3.51     | 0.18 | <b>0.71</b>    | 0.07 |
| KL001 40uM                                      | 1.67    | 0.47  | 0.90    | 0.47    | 0.99    | 1.37    | 1.45    | 0.57              | 1.92              | 1.60     | 0.45 | <b>0.32</b>    | 0.10 |
| treatment (rep 2)                               | CycD1   | CycD3 | CDK4    | CDK6    | p21     | p27     | p16     | JA (w/o adj. exp) | JA' (w/ adj. exp) |          |      |                |      |
| DMSO                                            | 2.61    | 1.23  | 1.42    | 2.29    | 1.34    | 1.39    | 1.29    | 2.66              | 5.26              |          |      |                |      |
| KL001 15uM                                      | 1.94    | 0.95  | 1.32    | 1.72    | 1.18    | 1.23    | 1.55    | 1.66              | 3.77              |          |      |                |      |
| KL001 30uM                                      | 1.30    | 0.94  | 1.42    | 1.25    | 0.94    | 1.21    | 1.55    | 1.21              | 3.63              |          |      |                |      |
| KL001 40uM                                      | 0.78    | 0.75  | 0.67    | 0.48    | 0.99    | 1.00    | 1.33    | 0.40              | 1.28              |          |      |                |      |
| <b>SR9009</b>                                   |         |       |         |         |         |         |         |                   |                   |          |      |                |      |
| treatment (rep 1)                               | CycD1   | CycD3 | Cdk4    | Cdk6    | p21     | p27     | p16     | JA (w/o adj. exp) | JA' (w/ adj. exp) | Mean JA' | sd   | normalized JA' | sd   |
| DMSO                                            | 4.10    | 1.27  | 1.53    | 1.59    | 1.45    | 1.11    | 2.39    | 2.53              | 6.03              | 5.77     | 0.37 | <b>1.00</b>    | 0.00 |
| SR9009 2uM                                      | 4.65    | 0.97  | 1.12    | 1.15    | 1.71    | 0.85    | 2.52    | 1.89              | 4.17              | 3.95     | 0.30 | <b>0.69</b>    | 0.07 |
| SR9009 4uM                                      | 0.47    | 0.37  | 0.56    | 0.44    | 0.70    | 0.42    | 2.70    | 0.16              | 0.52              | 0.50     | 0.02 | <b>0.09</b>    | 0.01 |
| SR9009 5uM                                      | 0.22    | 0.31  | 0.52    | 0.32    | 0.61    | 0.38    | 2.54    | 0.09              | 0.34              | 0.31     | 0.05 | <b>0.06</b>    | 0.01 |
| treatment (rep 2)                               | CycD1   | CycD3 | CDK4    | CDK6    | p21     | p27     | p16     | JA (w/o adj. exp) | JA' (w/ adj. exp) |          |      |                |      |
| DMSO                                            | 3.83    | 1.20  | 1.46    | 1.36    | 1.69    | 1.06    | 1.82    | 2.33              | 5.50              |          |      |                |      |
| SR9009 2uM                                      | 4.45    | 0.91  | 1.08    | 0.92    | 2.03    | 0.74    | 2.03    | 1.68              | 3.74              |          |      |                |      |
| SR9009 4uM                                      | 0.49    | 0.28  | 0.52    | 0.26    | 0.78    | 0.49    | 1.84    | 0.14              | 0.49              |          |      |                |      |
| SR9009 5uM                                      | 0.20    | 0.16  | 0.49    | 0.21    | 0.72    | 0.42    | 1.41    | 0.07              | 0.27              |          |      |                |      |
| <i>Gene expression (estimated from Ref [2])</i> |         |       |         |         |         |         |         |                   |                   |          |      |                |      |
|                                                 | CycD1   | CycD3 | Cdk4    | Cdk6    | p21     | p27     | p16     |                   |                   |          |      |                |      |
| relative expression                             | 0.64    | 1.00  | 0.89    | 0.03    | 0.30    | 0.10    | 0.15    |                   |                   |          |      |                |      |
| sd                                              | 0.00013 | 0     | 0.00023 | 2.2E-05 | 0.00012 | 2.4E-05 | 8.1E-05 |                   |                   |          |      |                |      |

The protein levels of CycD1, CycD3, Cdk4, Cdk6, p21, p27, and p16 were derived from Western blot as in Fig. 3 and S5 and averaged over 10 and 14 hr in each of the two replicates (rep 1 and 2). The joint activity (JA) of CycD/Cdk4,6 was assumed to be positively proportional to the combined levels of CycD and Cdk4,6 components and negatively proportional to the combined level of CKI components,  $JA = (CycD1+CycD3)(Cdk4+Cdk6)/(p16+p21+p27)$ . Next, JA was adjusted (JA') according to the relative gene expression level of each component (estimated from Ref. 2 based on the RNA-seq data in growing REF/E23 cells). The mean JA' value was obtained by averaging over rep 1 and 2 at each treatment condition and subsequently normalized to the DMSO control. (sd, standard deviation).

## Supplementary References

1. Yao, G., Lee, T.J., Mori, S., Nevins, J.R. & You, L. A bistable Rb-E2F switch underlies the restriction point. *Nat Cell Biol* **10**, 476-482 (2008).
2. Fujimaki, K. *et al.* Graded regulation of cellular quiescence depth between proliferation and senescence by a lysosomal dimmer switch. *Proceedings of the National Academy of Sciences* **116**, 22624-22634 (2019).
